# Supplementary material for: The selective activation of a C–F bond with an auxiliary strong Lewis acid: a method to change the activation preference of C–F and C–H bonds
Source: Royal Society of Chemistry journal article supplement (doi:10.1039/c6dt03235d), 2016-01-01
Supplement: c6dt03235d1.pdf [file c6dt03235d1.pdf]

**The Selective Activation of C-F Bond with the Auxiliary of Strong  
Lewis Acid --- A Method to Change the Activation Preference of C-F  
and C-H bond**

Lin Wang,<sup>a</sup> Hongjian Sun,<sup>a</sup> Xiaoyan Li,<sup>a,\*</sup> Olaf Fuhr,<sup>b</sup> Dieter Fenske<sup>b</sup>

## SI. Selected X-ray crystallographic data

|                                           | 10*                                                               | 11                                                   | 12                                                  |
|-------------------------------------------|-------------------------------------------------------------------|------------------------------------------------------|-----------------------------------------------------|
| formula                                   | C <sub>25</sub> H <sub>44</sub> BF <sub>6</sub> FeNP <sub>4</sub> | C <sub>23</sub> H <sub>38</sub> BrFFeNP <sub>3</sub> | C <sub>26</sub> H <sub>44</sub> FFeINP <sub>3</sub> |
| $M_z$                                     | 663.15                                                            | 576.21                                               | 665.28                                              |
| crystal system                            | Monoclinic                                                        | Monoclinic                                           | Monoclinic                                          |
| space group                               | P2(1)/n                                                           | P2(1)/c                                              | P2(1)/c                                             |
| a [Å]                                     | 11.7534(1)                                                        | 8.9625(3)                                            | 15.6776(12)                                         |
| b [Å]                                     | 19.4894(2)                                                        | 33.2859(13)                                          | 13.1670(11)                                         |
| c [Å]                                     | 14.8134(1)                                                        | 9.0190(3)                                            | 16.6228(17)                                         |
| $\alpha$ [°]                              | 90.00                                                             | 90.00                                                | 90.00                                               |
| $\beta$ [°]                               | 93.7660(1)                                                        | 95.341(3)                                            | 118.742(5)                                          |
| $\gamma$ [°]                              | 90.00                                                             | 90.00                                                | 90.00                                               |
| V [Å <sup>3</sup> ]                       | 3385.9(5)                                                         | 2678.91(2)                                           | 3008.6(5)                                           |
| T [K]                                     | 296(2)                                                            | 153(2)                                               | 296(2)                                              |
| Z                                         | 4                                                                 | 4                                                    | 4                                                   |
| $\mu$ [mm <sup>-1</sup> ]                 | 0.683                                                             | 2.252                                                | 1.708                                               |
| total reflns                              | 25229                                                             | 7826                                                 | 42857                                               |
| unique reflns                             | 7774                                                              | 4112                                                 | 7226                                                |
| R <sub>int</sub>                          | 0.0306                                                            | 0.0487                                               | 0.0858                                              |
| R <sub>1</sub> [I>2 $\sigma$ (I)]         | 0.0352                                                            | 0.0533                                               | 0.0624                                              |
| wR(F <sup>2</sup> )<br>[I>2 $\sigma$ (I)] | 0.1014                                                            | 0.1477                                               | 0.1558                                              |
| R <sub>1</sub> (all data)                 | 0.0456                                                            | 0.0594                                               | 0.0957                                              |
| wR(F <sup>2</sup> )(all data)             | 0.1135                                                            | 0.1544                                               | 0.1778                                              |
| GOF on F <sup>2</sup>                     | 0.541                                                             | 1.079                                                | 1.084                                               |

\* The disorder solvent voids were squeezed. Based on the squeezed result, there are about 2.8 ethyl ether molecules in one cell.

### SII. The detailed crystal data of complex

#### Complex 10

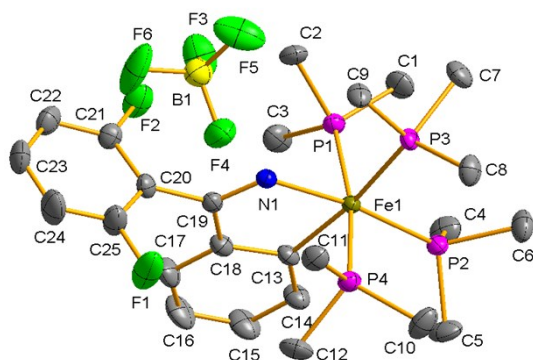

Fe(1)-C(13): 2.0164(2) Å, Fe(1)-N(1): 1.9858(2) Å, F(3)-B(1): 1.389(3) Å, F(4)-B(1): 1.370(3) Å, F(5)-B(1): 1.380(3) Å, F(6)-B(1): 1.367(3) Å. C(13)-Fe(1)-P(3): 171.72(6)°, P(1)-Fe(1)-P(3): 91.19(2)°

#### Complex 11

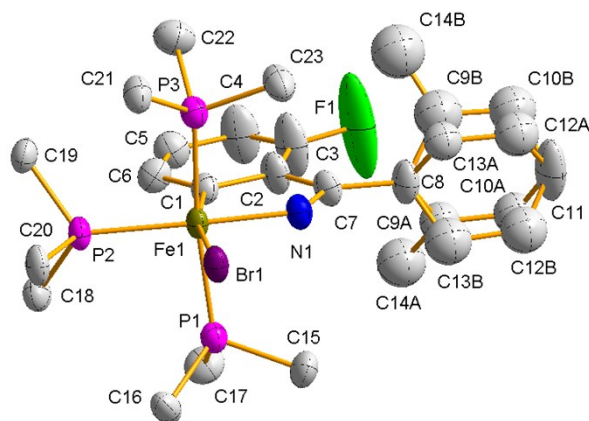

Fe(1)-Br(1): 2.5653(7) Å, Fe(1)-N(1): 1.945(4) Å, P(2)-Fe(1)-N(1): 175.45(1)°, P(1)-Fe(1)-C(1): 93.38(15)°

#### Complex 12

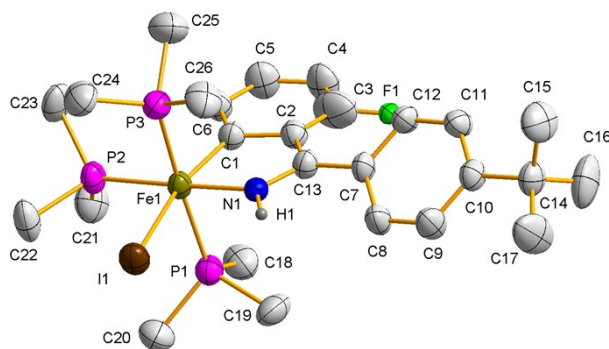

Fe(1)-I(1): 2.7478(9) Å, Fe(1)-N(1): 1.930(5) Å, P(2)-Fe(1)-P(3): 94.01(7)°, P(1)-Fe(1)-P(3): 172.69(7)°

### SIII. The IR and NMR data of complexes

#### Complex 8

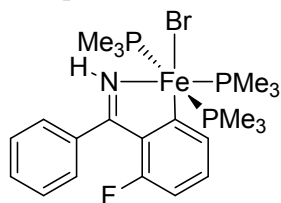

#### IR spectrum

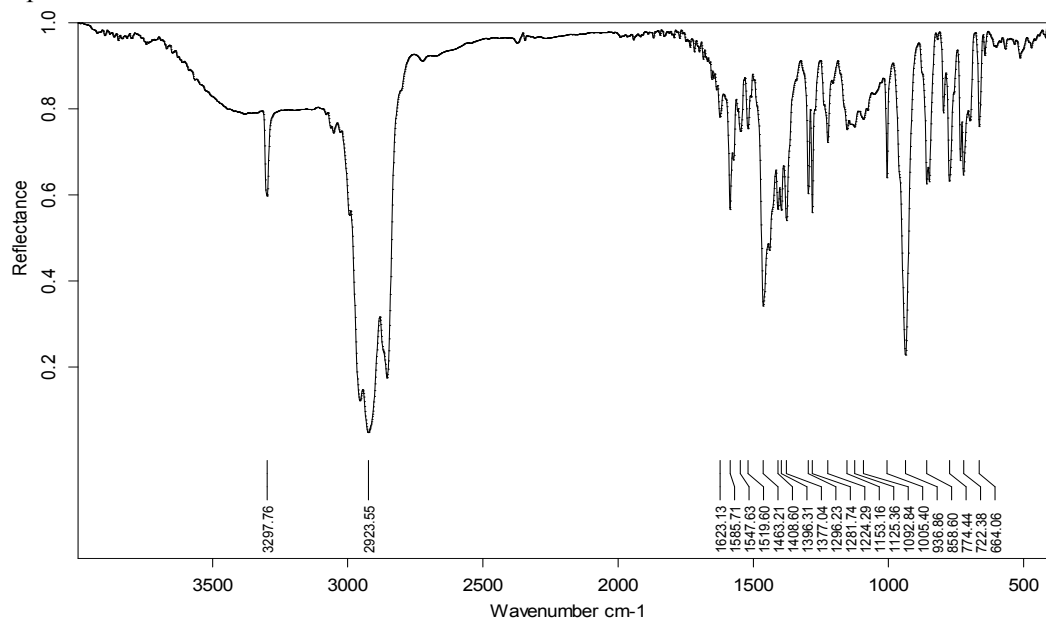

#### <sup>1</sup>H NMR spectrum (C<sub>6</sub>D<sub>6</sub>)

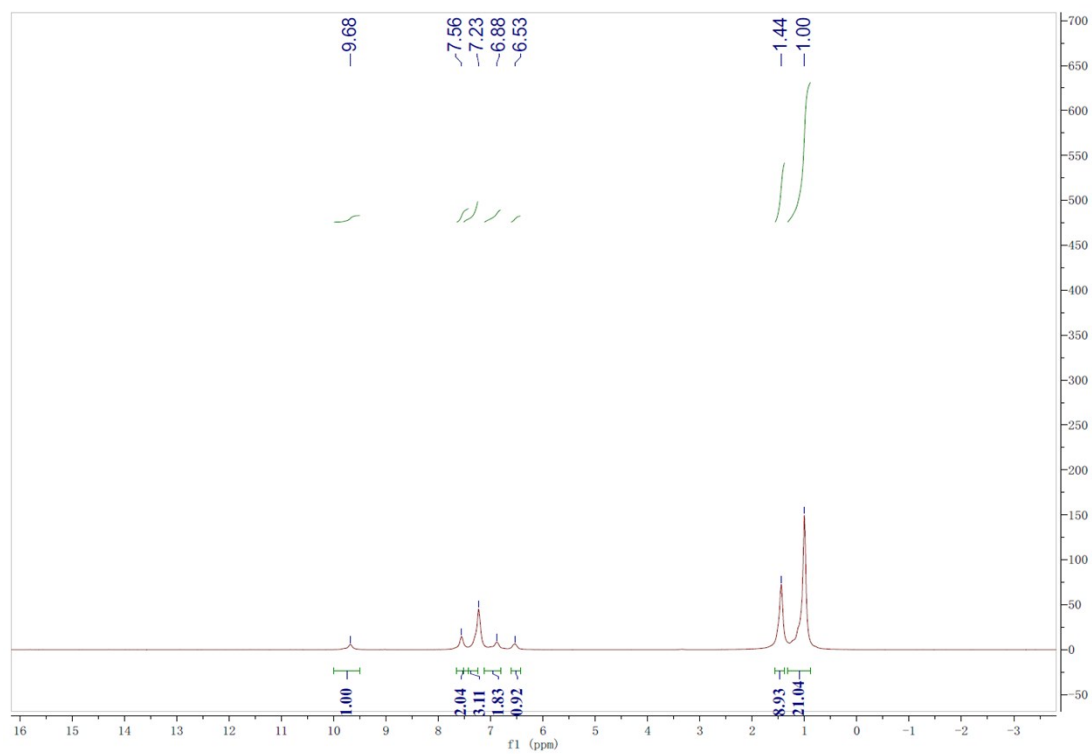

Note: Complex 8 was synthesized in diethyl ether.

$^{19}\text{F}$  {H} NMR spectrum ( $\text{C}_6\text{D}_6$ )

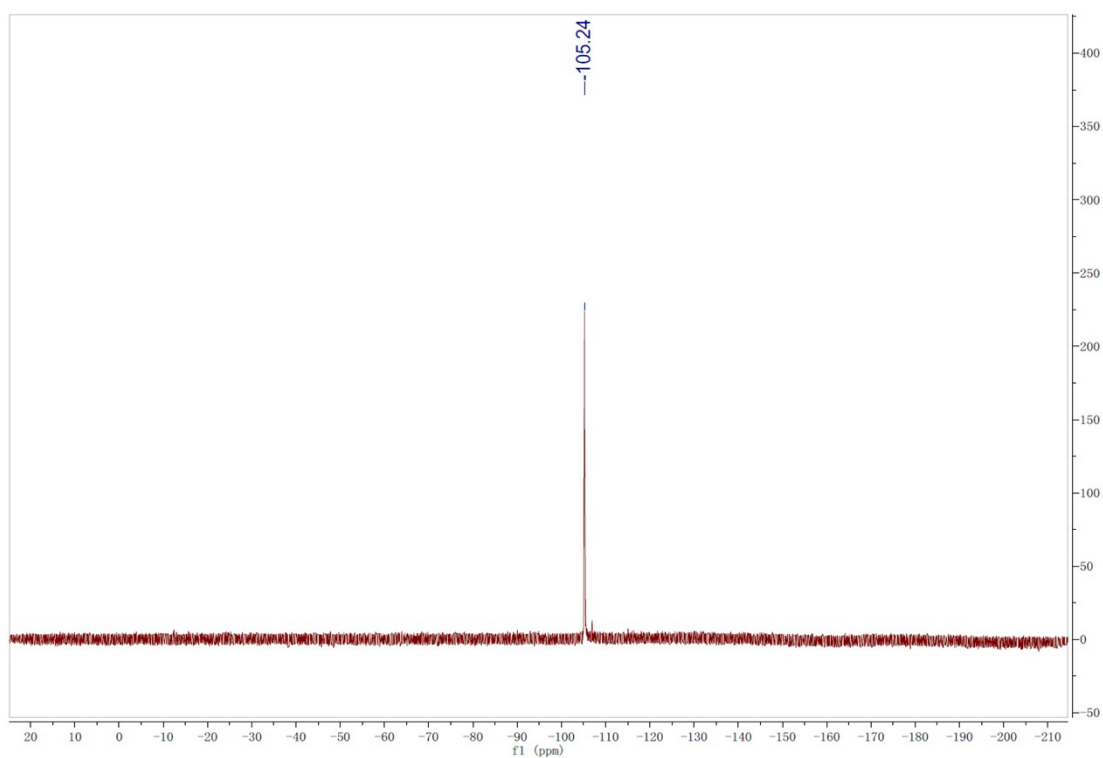

Note: Complex **8** was synthesized in ethyl ether.

$^{31}\text{P}$  {H} NMR spectrum ( $\text{C}_6\text{D}_6$ )

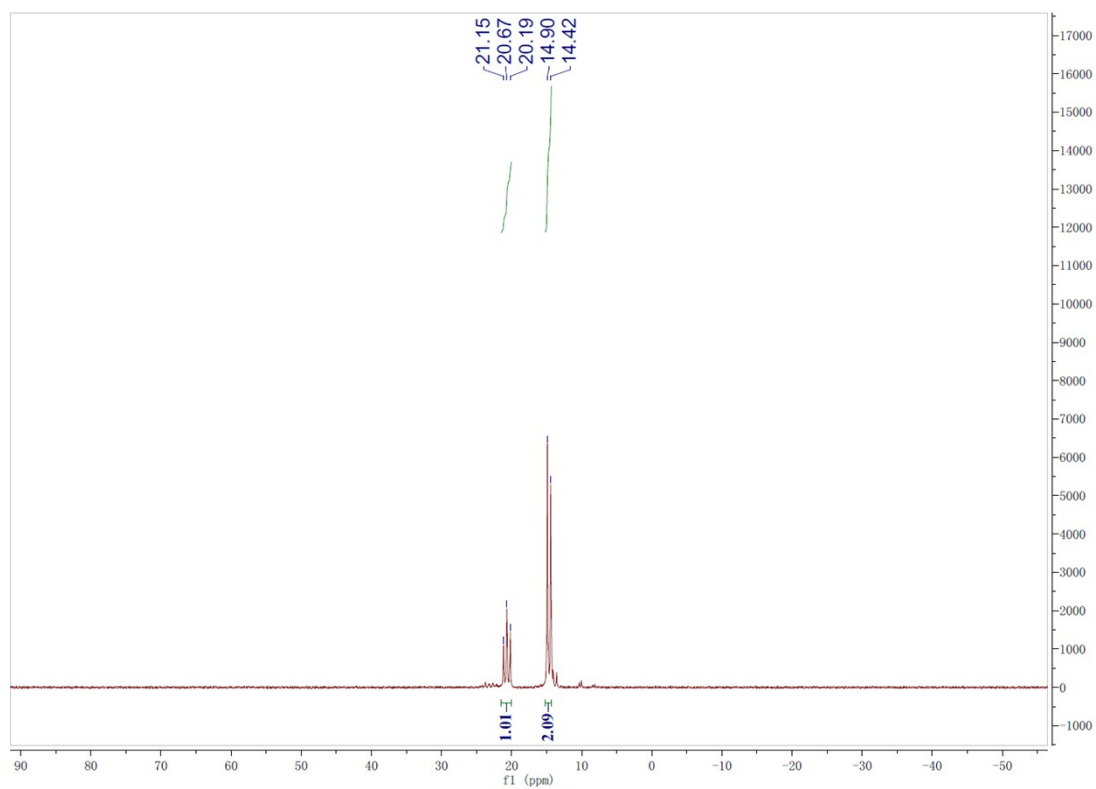

Note: Complex **8** was synthesized in diethyl ether

$^{13}\text{C}$  {H} NMR spectrum ( $\text{C}_6\text{D}_6$ )

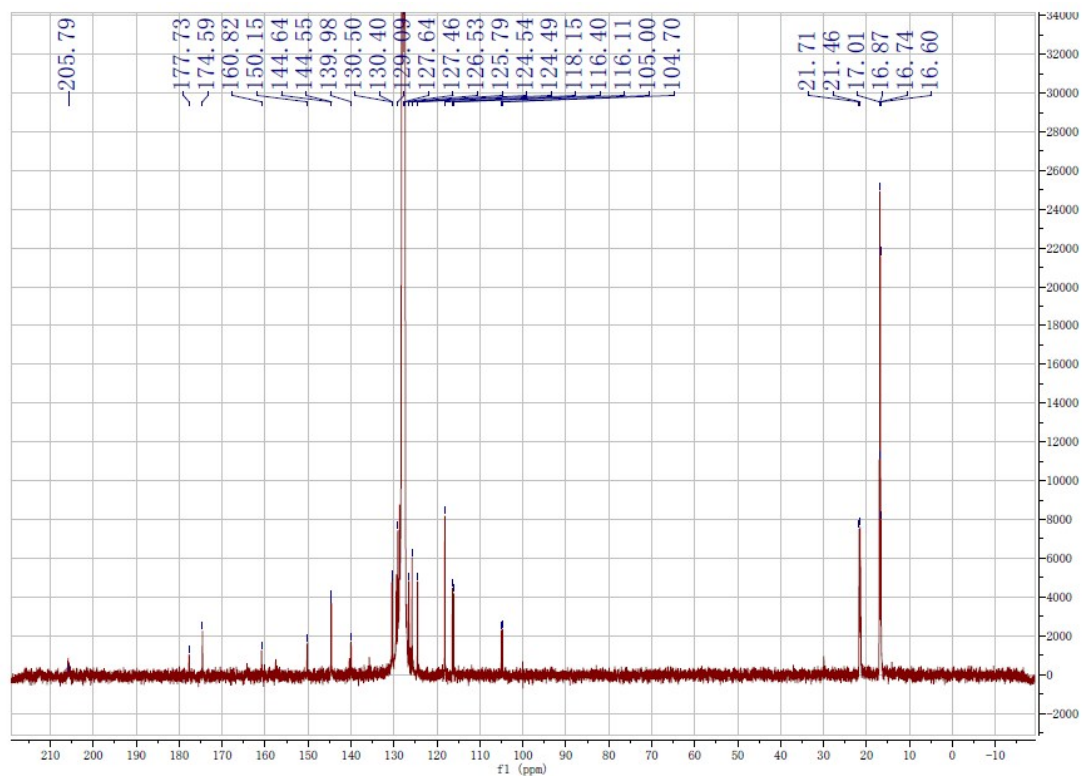

Note: Complex **8** was synthesized in diethyl ether.

### Complex 9

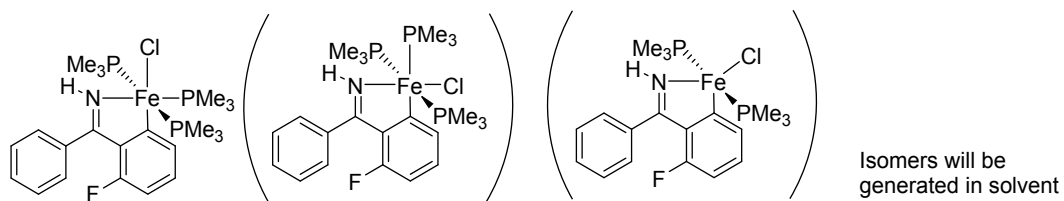

IR spectrum

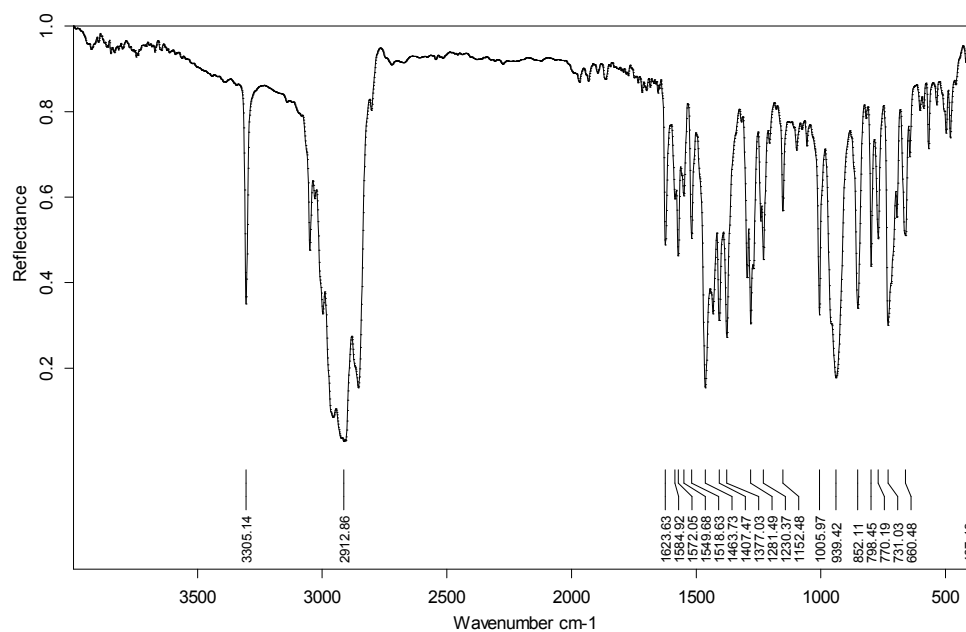

$^1\text{H}$  NMR spectrum ( $\text{C}_6\text{D}_6$ )

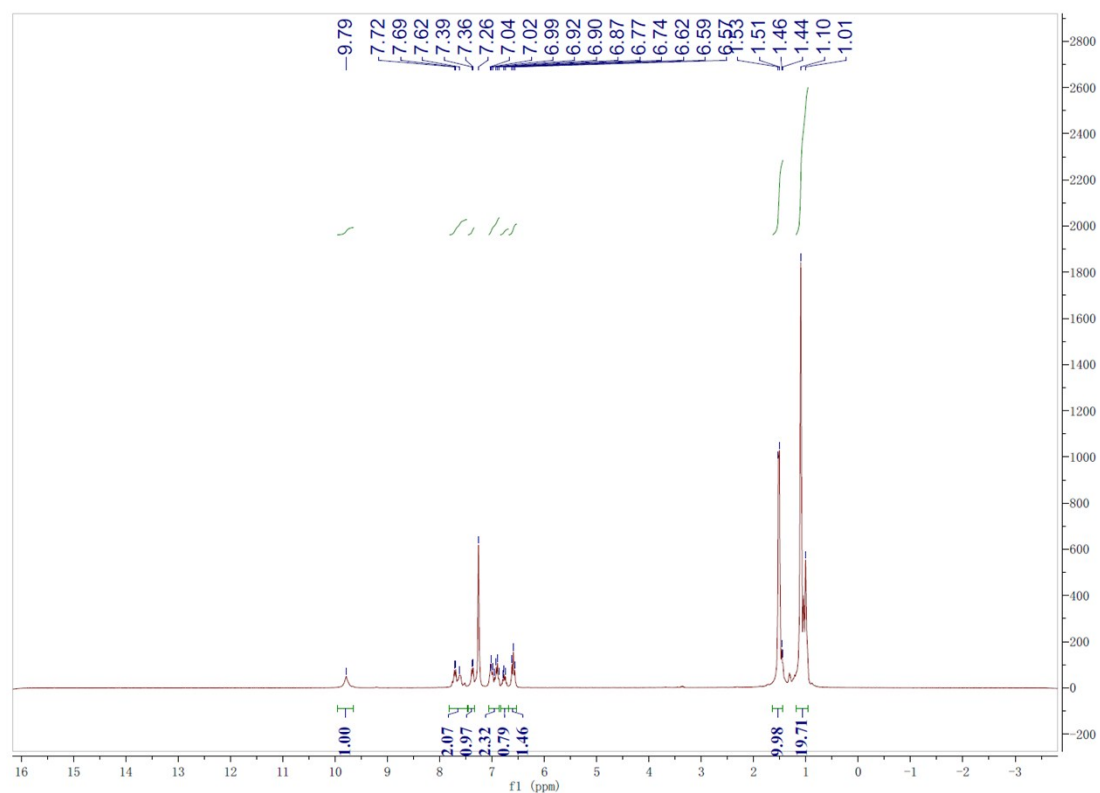

Note: Complex **9** was synthesized in diethyl ether. The signals at 1.01 and 1.05 ppm are the signals of  $\text{PMe}_3$  contained by isomers.

$^{19}\text{F}$  {H} NMR spectrum ( $\text{C}_6\text{D}_6$ )

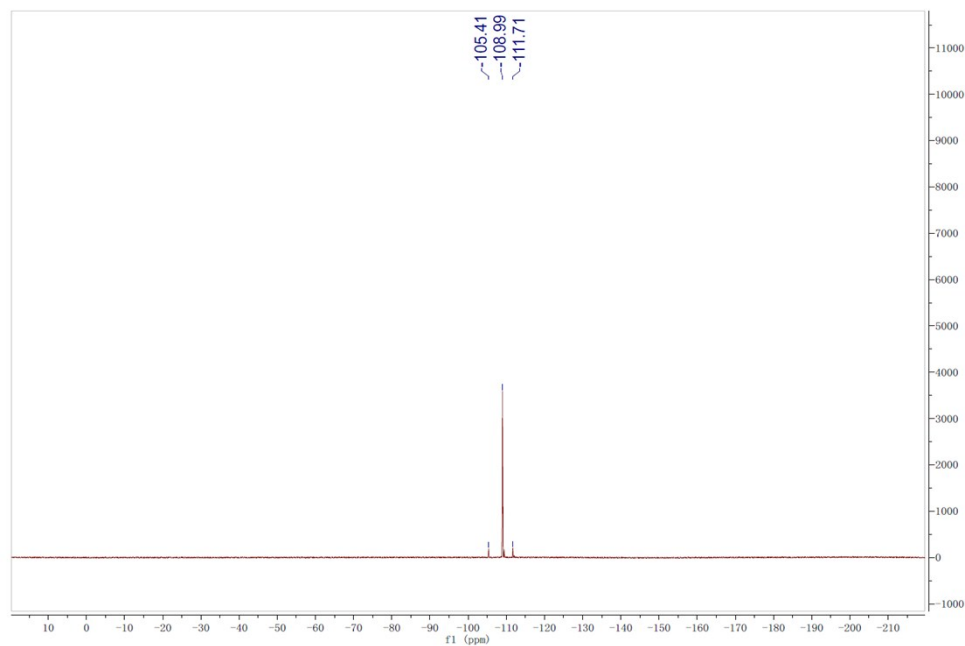

Note: Complex **9** was synthesized in diethyl ether. The signals at -111.7 and -105.4 ppm are the signals of isomers.

$^{31}\text{P} \{^1\text{H}\}$  NMR spectrum ( $\text{C}_6\text{D}_6$ )

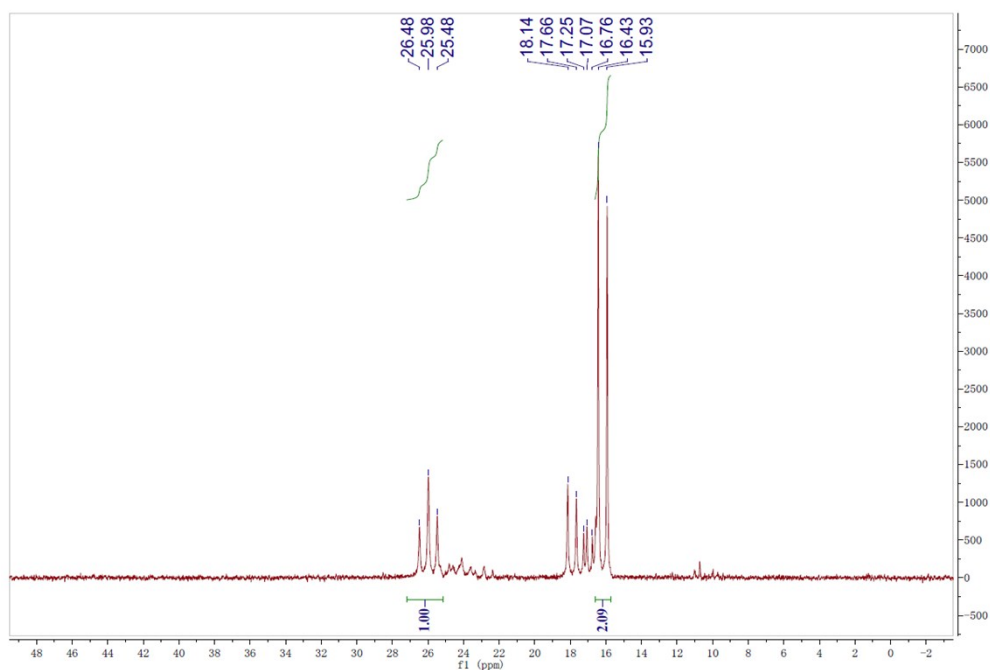

Note: Complex **9** was synthesized in diethyl ether. The signals at 17.9 ppm and 17.0 ppm are the signals of isomers.

### Complex 10

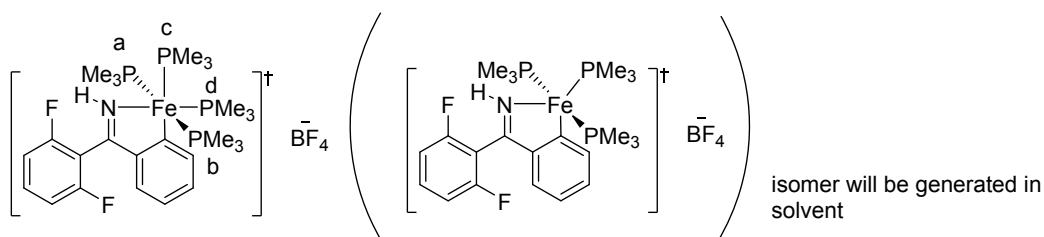

IR spectrum

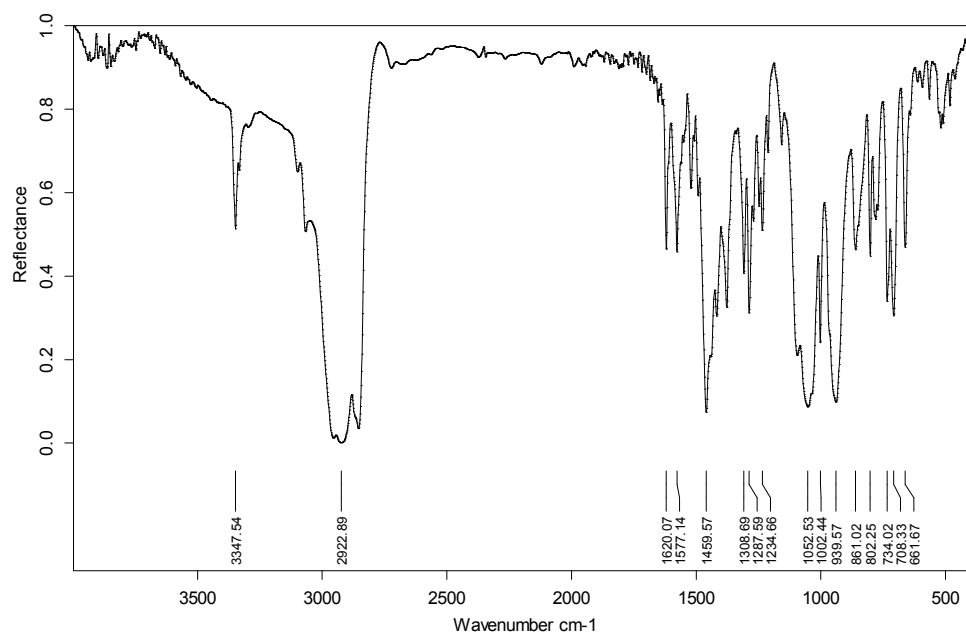



$^1\text{H}$  NMR spectrum ( $\text{C}_2\text{D}_6\text{CO}$ )

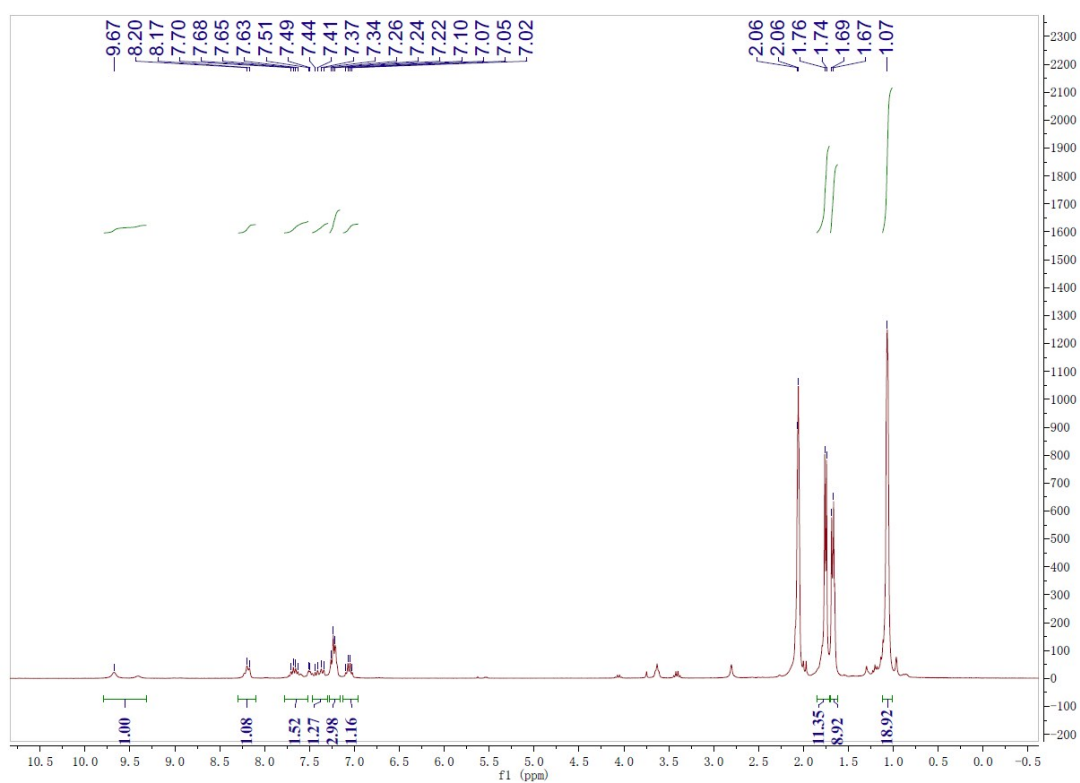

Note: Complex **10** was synthesized in THF and crystallized in THF/diethyl ether mix solvent.

$^{19}\text{F}$  { $^1\text{H}$ } NMR spectrum ( $\text{C}_2\text{D}_6\text{CO}$ )

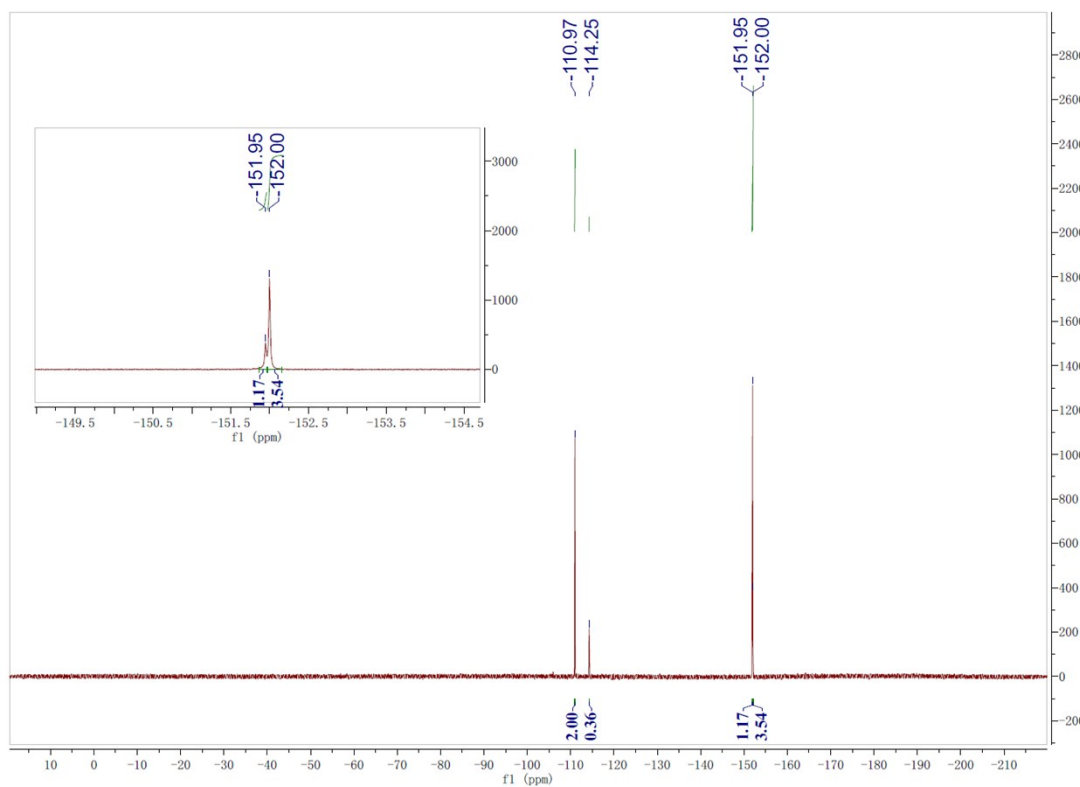

Note: Complex **10** was synthesized in THF and crystallized in THF/diethyl ether mix solvent. The signals at -114.2 and -152.0 ppm are the signal of isomer.

$^{31}\text{P} \{^1\text{H}\}$  NMR spectrum ( $\text{C}_2\text{D}_6\text{CO}$ )

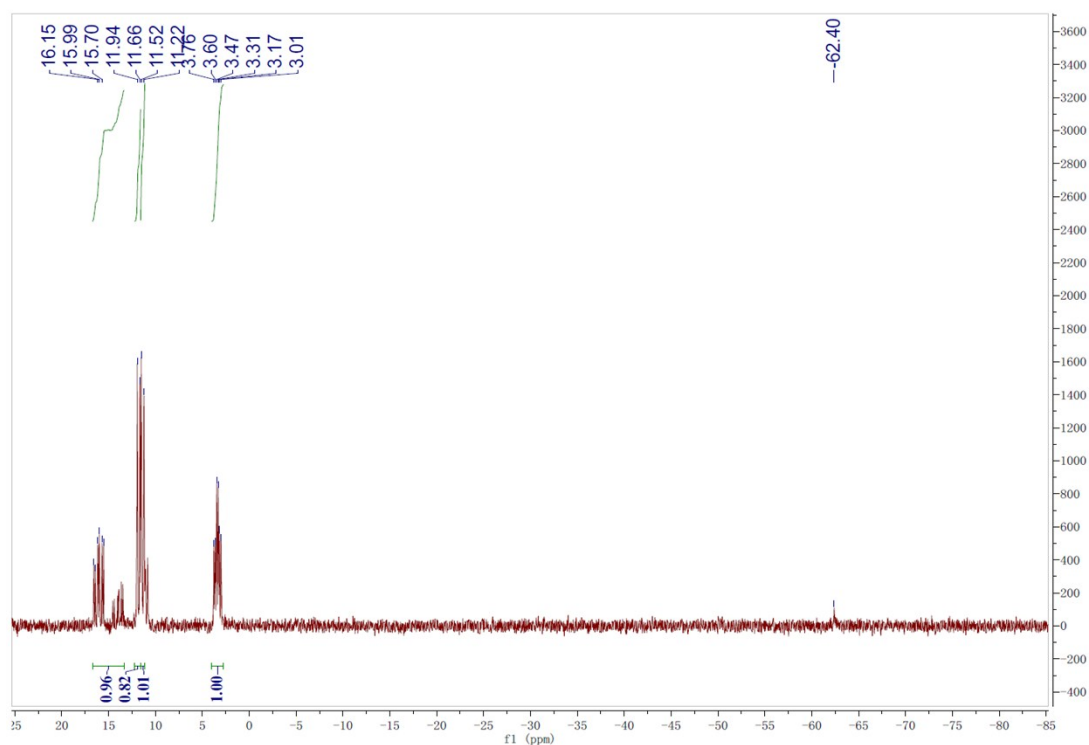

$^{31}\text{P} \{^1\text{H}\}$  NMR (121.5 MHz,  $\text{C}_6\text{D}_6$ , 298 K, ppm):  $\delta$  3.4 (td,  $^2J_{\text{P,P}} = 36.4$  Hz,  $^2J_{\text{P,P}} = 7.3$  Hz, Pd(c) ), 11.6 (dd,  $^2J_{\text{P,P}} = 36.4$  Hz,  $^2J_{\text{P,P}} = 51.0$  Hz, Pa & Pb ), 16.1 (td,  $^2J_{\text{P,P}} = 51.0$  Hz,  $^2J_{\text{P,P}} = 7.3$  Hz, Pc(d) ). The signals at 14 ppm are the signals of isomer produced by dissociation of  $\text{PMe}_3$  ligand of complex **10** in solvent and the signal of dissociated  $\text{PMe}_3$  ligand appears at -62.4 ppm.

$^{13}\text{C} \{^1\text{H}\}$  NMR spectrum ( $\text{C}_2\text{D}_6\text{CO}$ )

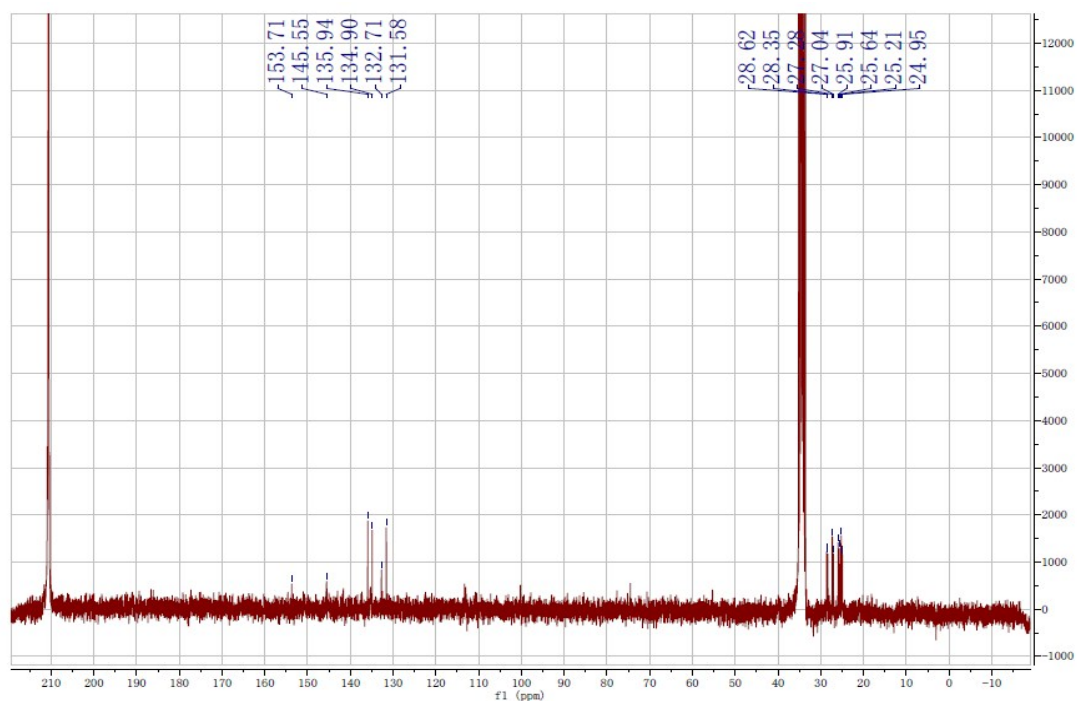

## Complex 11

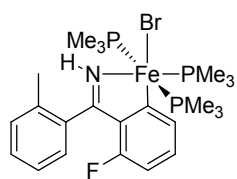

## IR spectrum

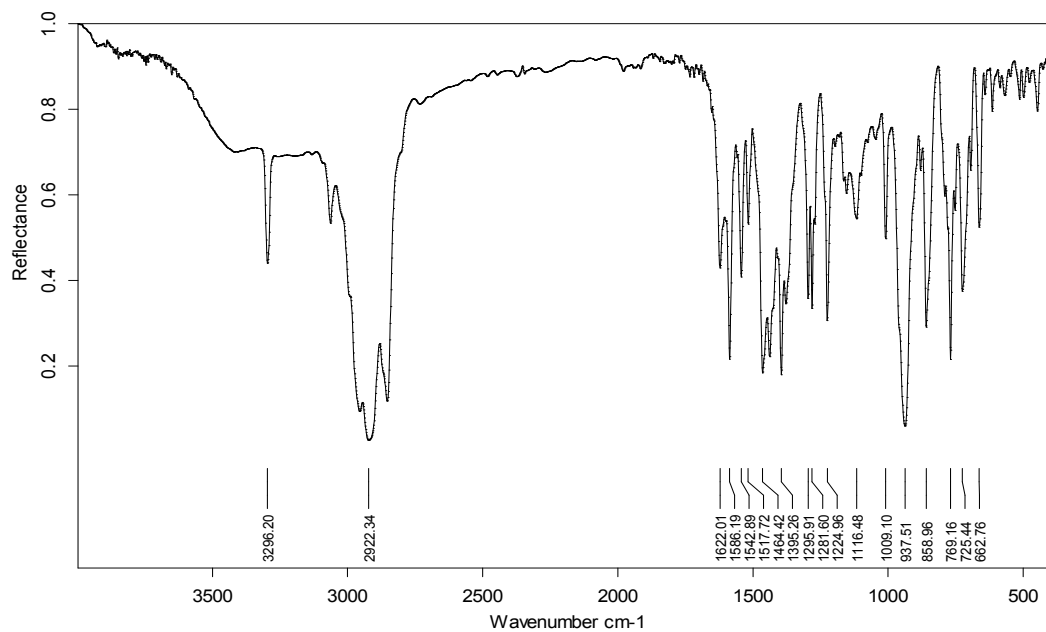

## <sup>1</sup>H NMR spectrum (C<sub>6</sub>D<sub>6</sub>)

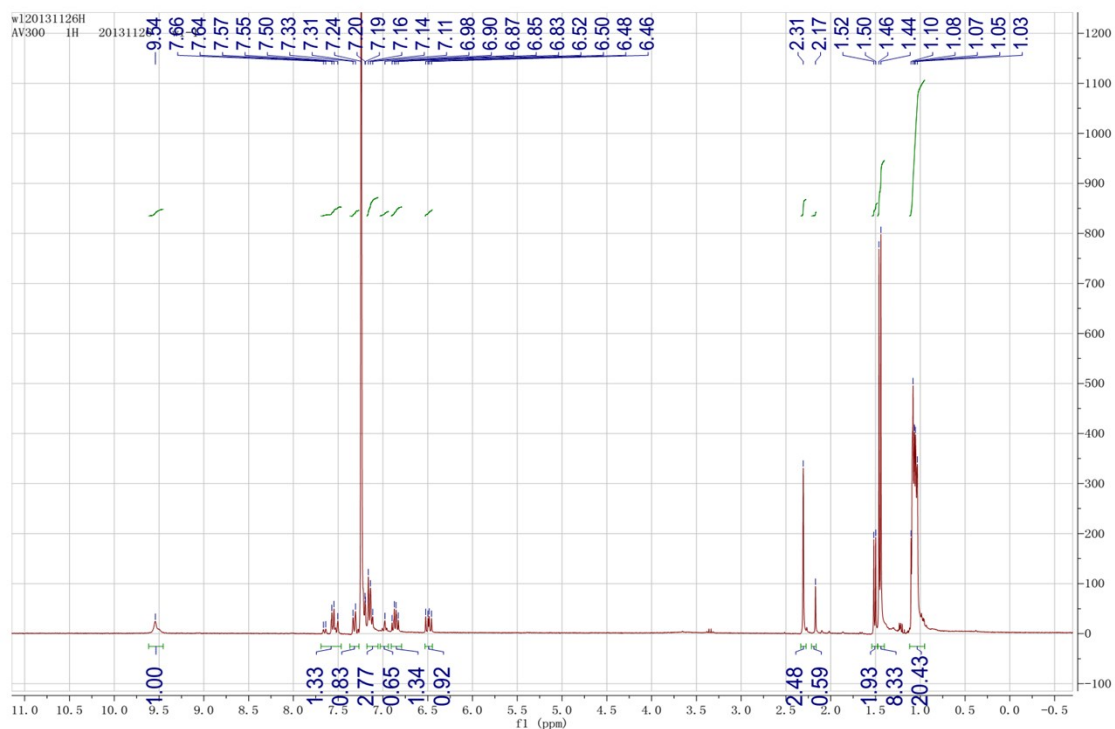

Note: Complex **11** was synthesized in diethyl ether. In solvent (C<sub>6</sub>D<sub>6</sub>), complex **11** would dissociate a PMe<sub>3</sub> ligand in some extent. The signals at 1.52, 1.27 ppm are the signal of this product.

$^{19}\text{F}$  {H} NMR spectrum ( $\text{C}_6\text{D}_6$ )

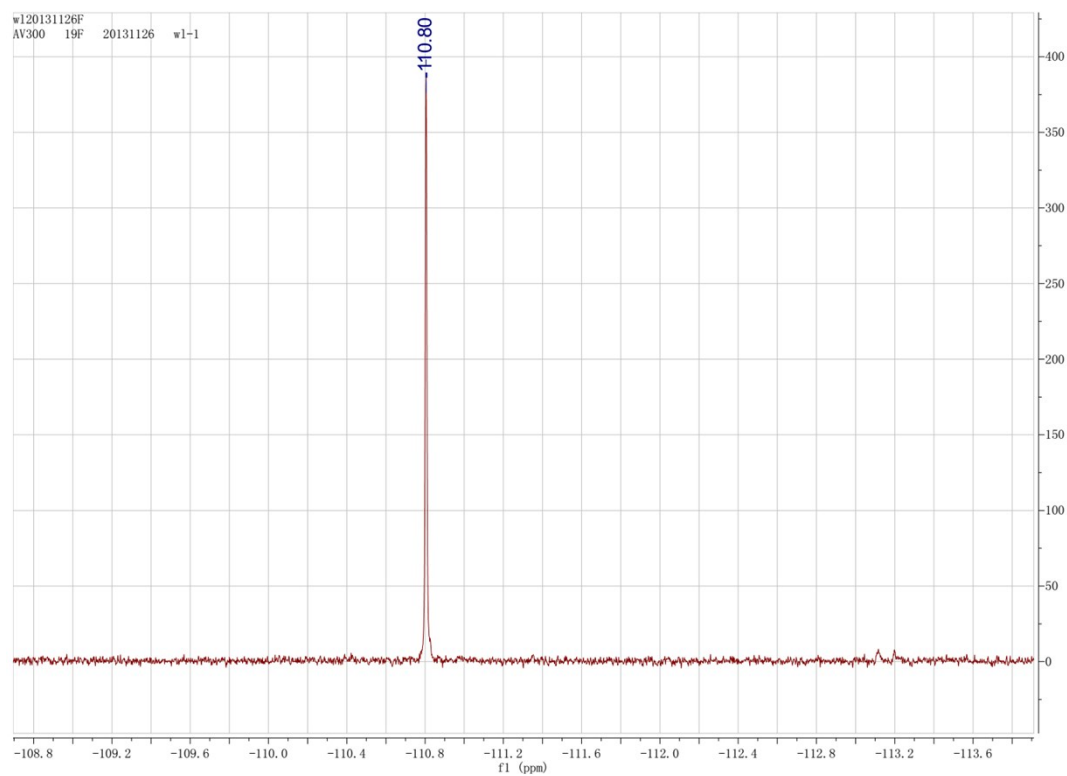

Note: Complex **11** was synthesized in diethyl ether.

$^{31}\text{P}$  {H} NMR spectrum ( $\text{C}_6\text{D}_6$ )

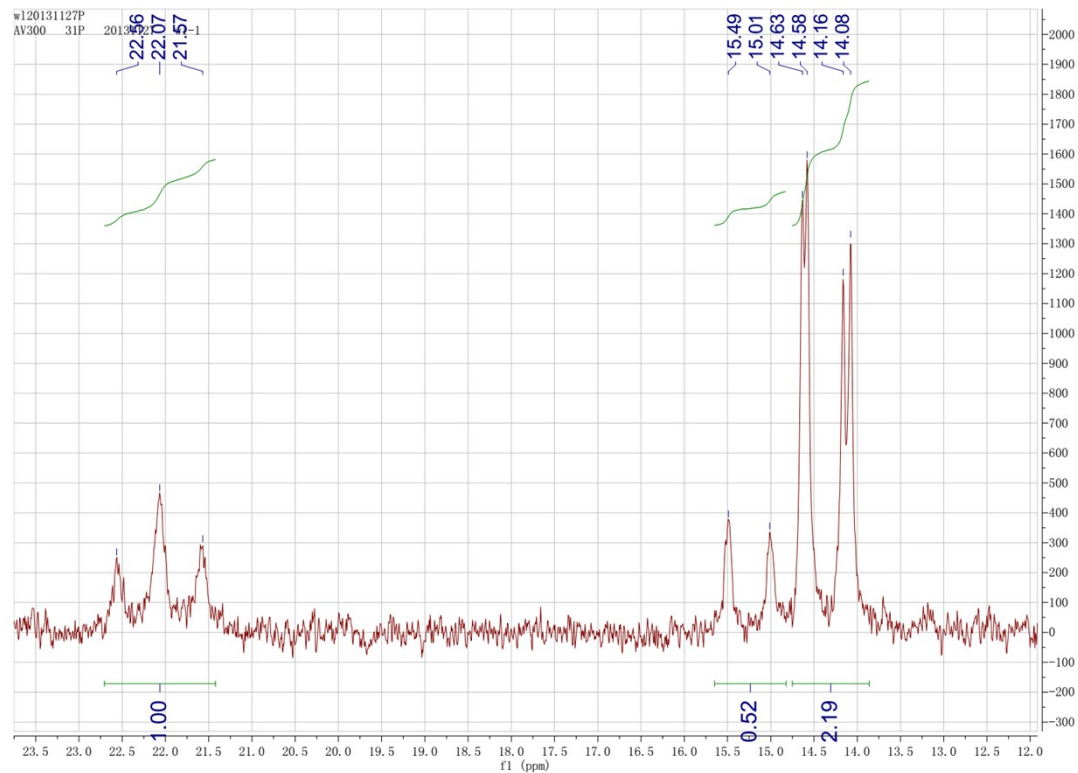

Note: Complex **11** was synthesized in diethyl ether. In solvent ( $\text{C}_6\text{D}_6$ ), complex **11** would dissociate a  $\text{PMe}_3$  ligand in some extent. The doublet at 15 ppm is the signal of this product.

$^{13}\text{C}$  {H} NMR spectrum ( $\text{C}_6\text{D}_6$ )

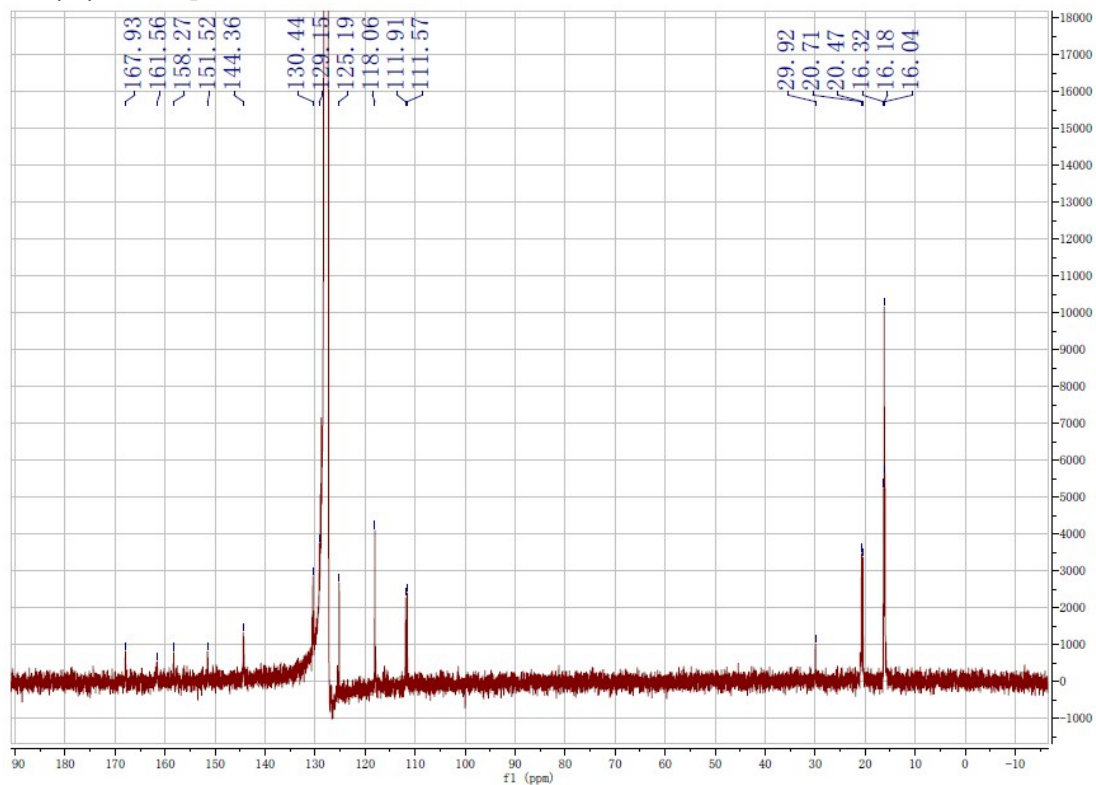

Complex 12

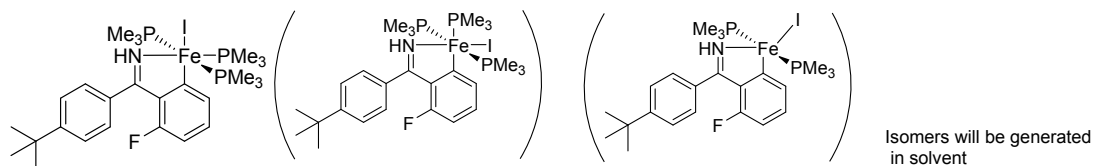

IR spectrum

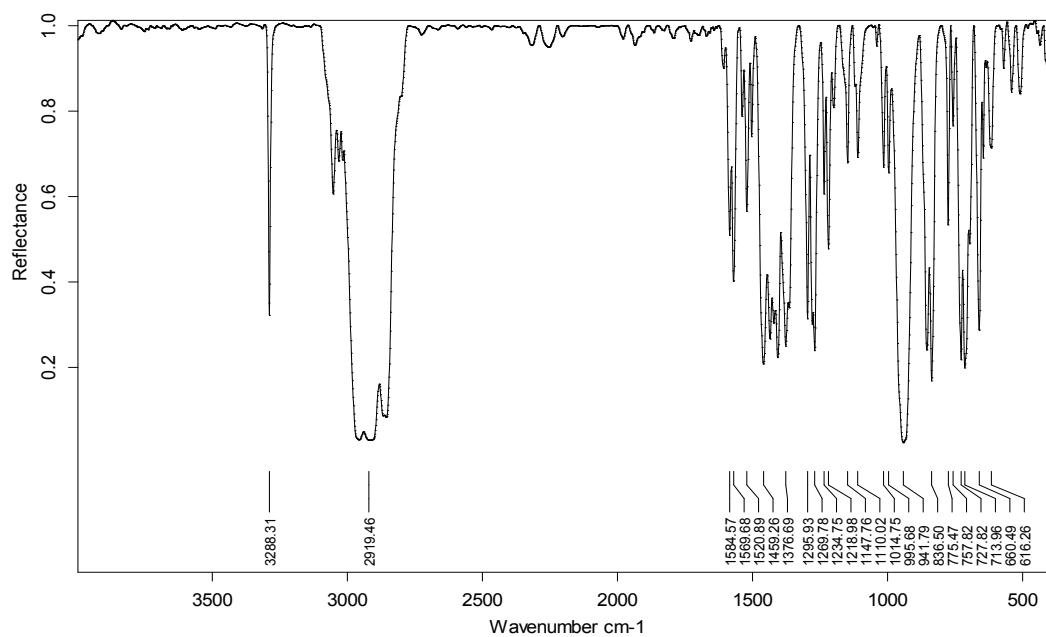

$^1\text{H}$  NMR spectrum ( $\text{C}_6\text{D}_6$ )

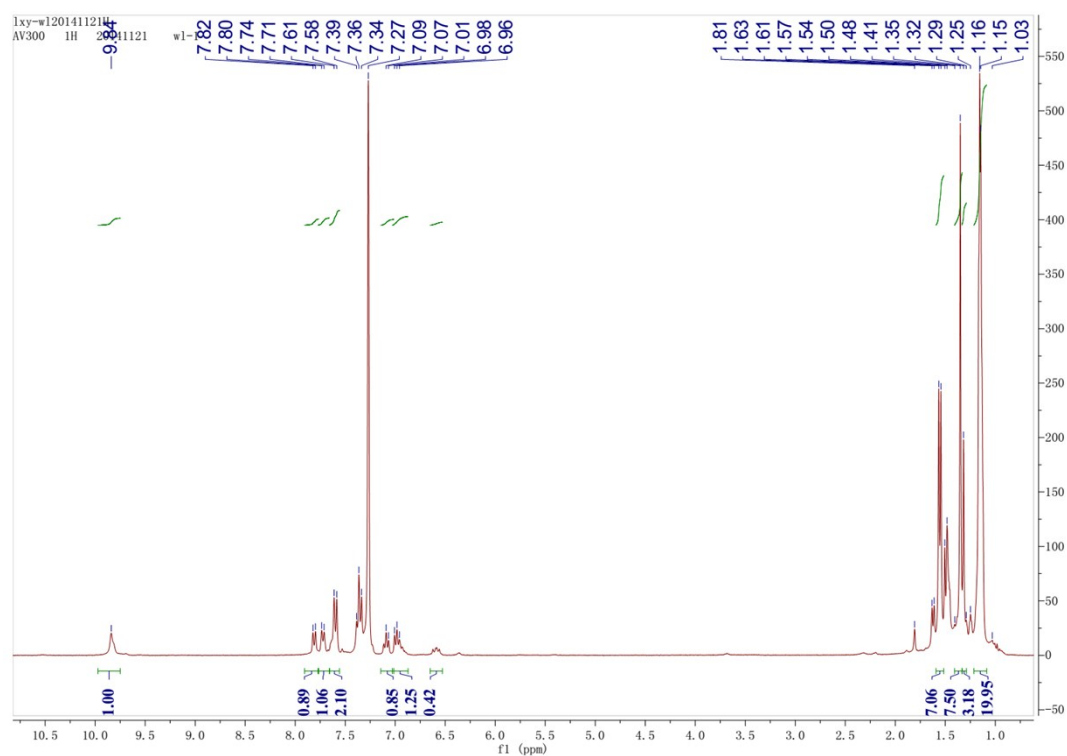

$^{31}\text{P}$  {H} NMR spectrum ( $\text{C}_6\text{D}_6$ )

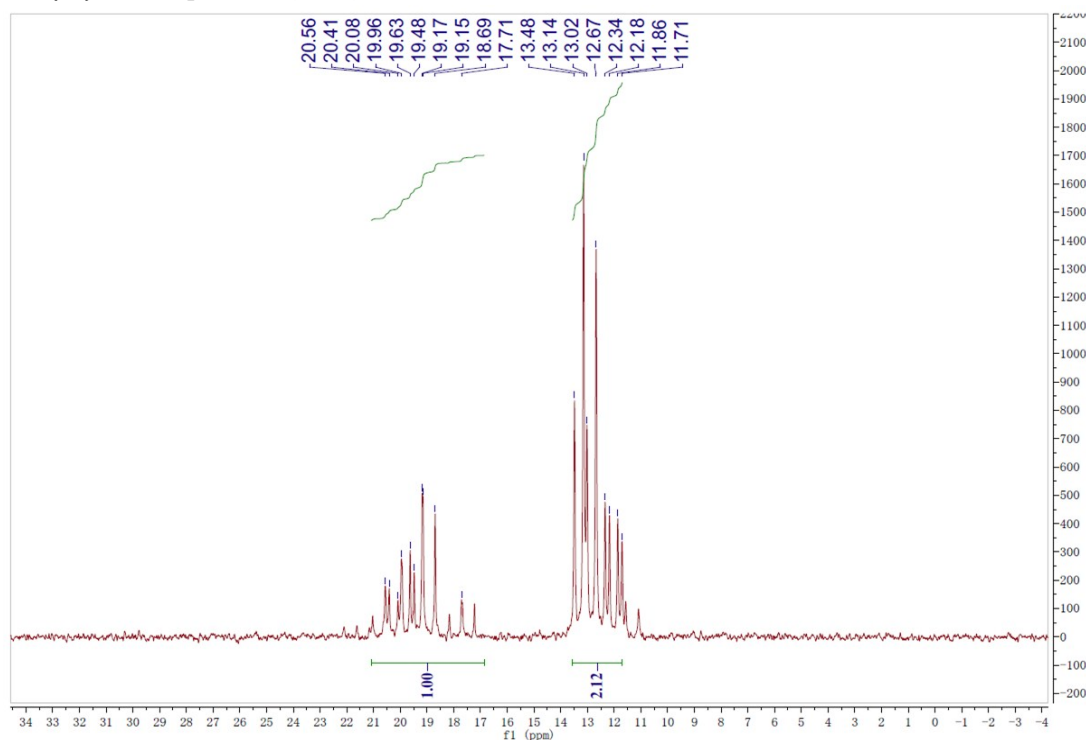

Note. In solvent ( $\text{C}_6\text{D}_6$ ), the arrange of  $\text{PMe}_3$  will occur. And In solvent ( $\text{C}_6\text{D}_6$ ), complex **12** would dissociate a  $\text{PMe}_3$  ligand in some extent. The signals of different isomers: 12.9 ppm (d,  $^2J_{\text{P,P}} = 56.9$  Hz) and 19.2 ppm (d,  $^2J_{\text{P,P}} = 56.9$  Hz); 13.1 ppm (d,  $^2J_{\text{P,P}} = 55.9$  Hz) and 20.0 ppm (d,  $^2J_{\text{P,P}} = 55.9$  Hz); 12.1 ppm (d,  $^2J_{\text{P,P}} = 58.3$  Hz); 11.9 ppm (d,  $^2J_{\text{P,P}} = 57.1$  Hz).

$^{19}\text{F} \{^1\text{H}\}$  NMR spectrum ( $\text{C}_6\text{D}_6$ )

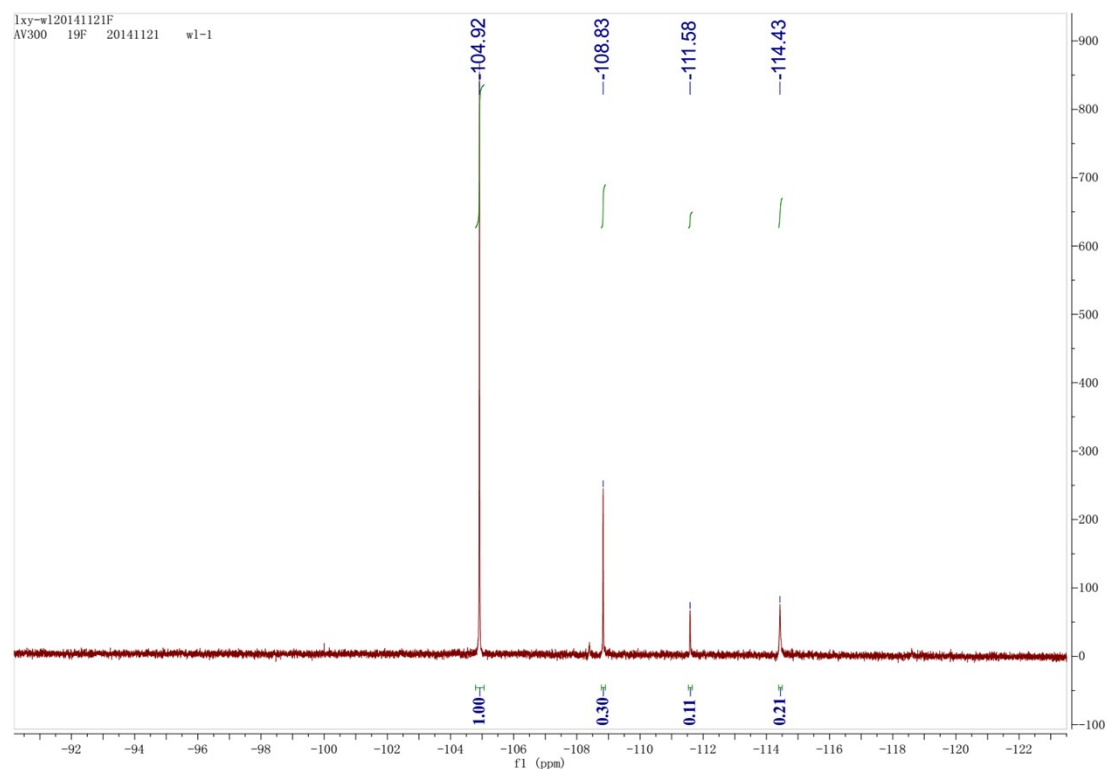

Note. The signals of different isomers: -104.9 ppm; -108.8 ppm; -111.6 ppm.

$^{13}\text{C} \{^1\text{H}\}$  NMR spectrum ( $\text{C}_6\text{D}_6$ )

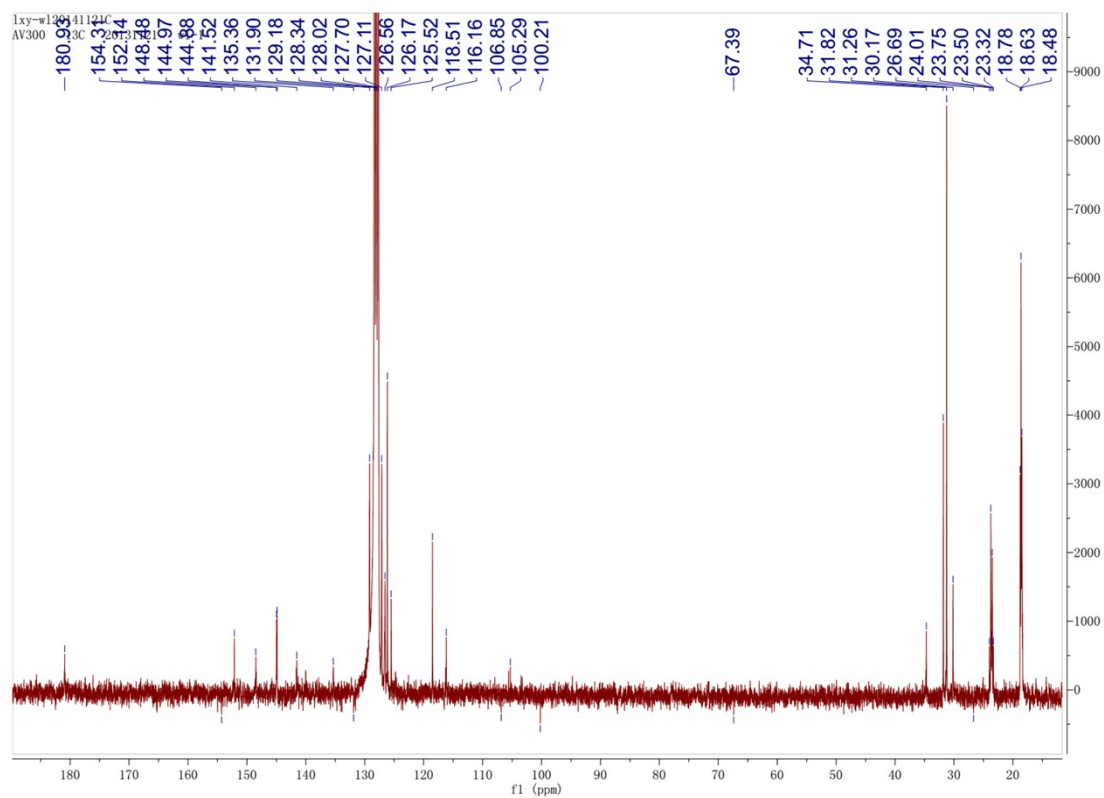

Note. Isomers exist.

## Complex 13

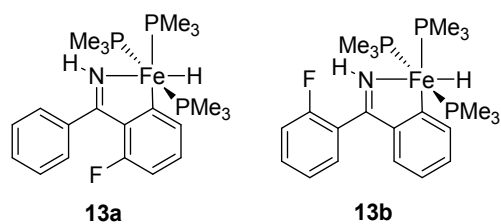

## IR spectrum

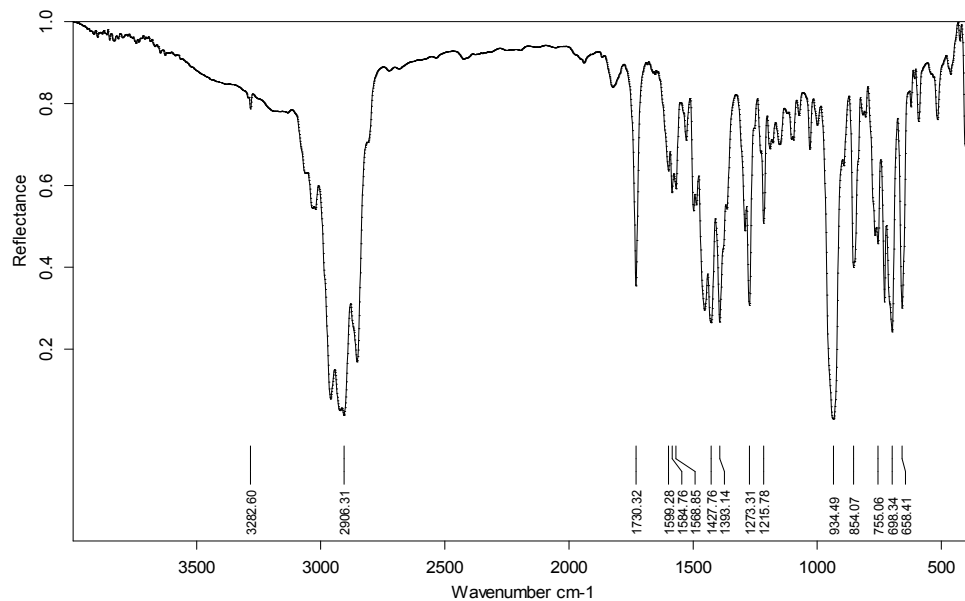

## $^1\text{H}$ NMR spectrum ( $\text{C}_6\text{D}_6$ )

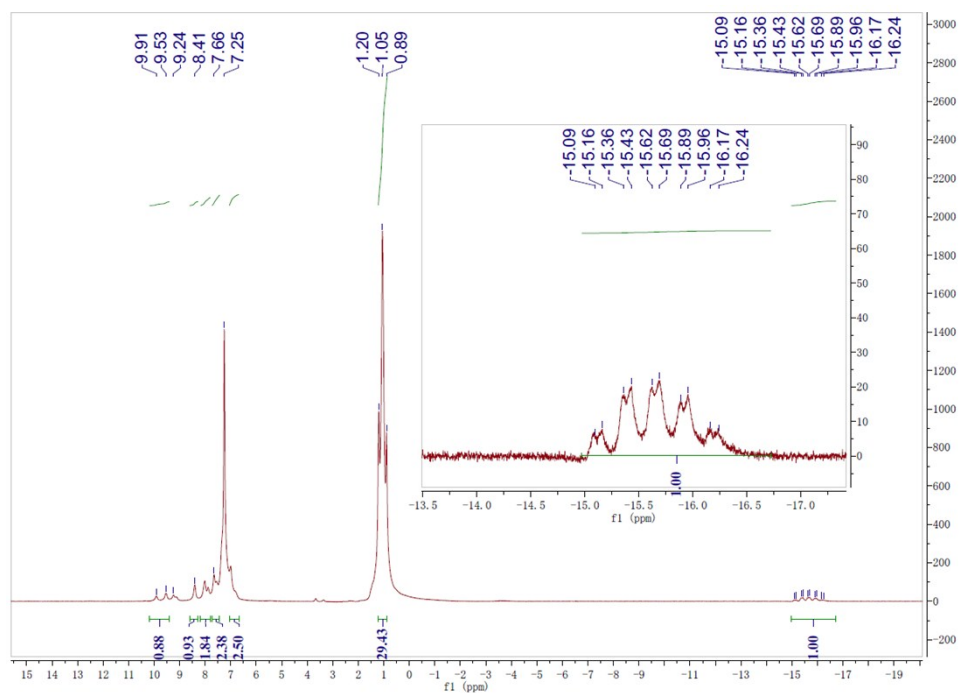

Note: Complexes **13a** and **13b** were synthesized in diethyl ether and crystallized in n-pentane.  $^1\text{H}$  NMR (300 MHz,  $\text{C}_6\text{D}_6$ , 298K, ppm):  $\delta$  -15.92, -15.26 (td,  $^2J_{\text{P,H}} = 21.0$  Hz,  $^2J_{\text{P,H}} = 84.0$  Hz, 1 H, Fe-H), 1.05 (m, 27 H,  $\text{P}(\text{CH}_3)_3$ ), 7.25 – 8.41 (m, 8H, Ar-H), 9.53, 9.91 (s, 1H, C=N-H).



$^{19}\text{F}$  {H} NMR spectrum ( $\text{C}_6\text{D}_6$ )

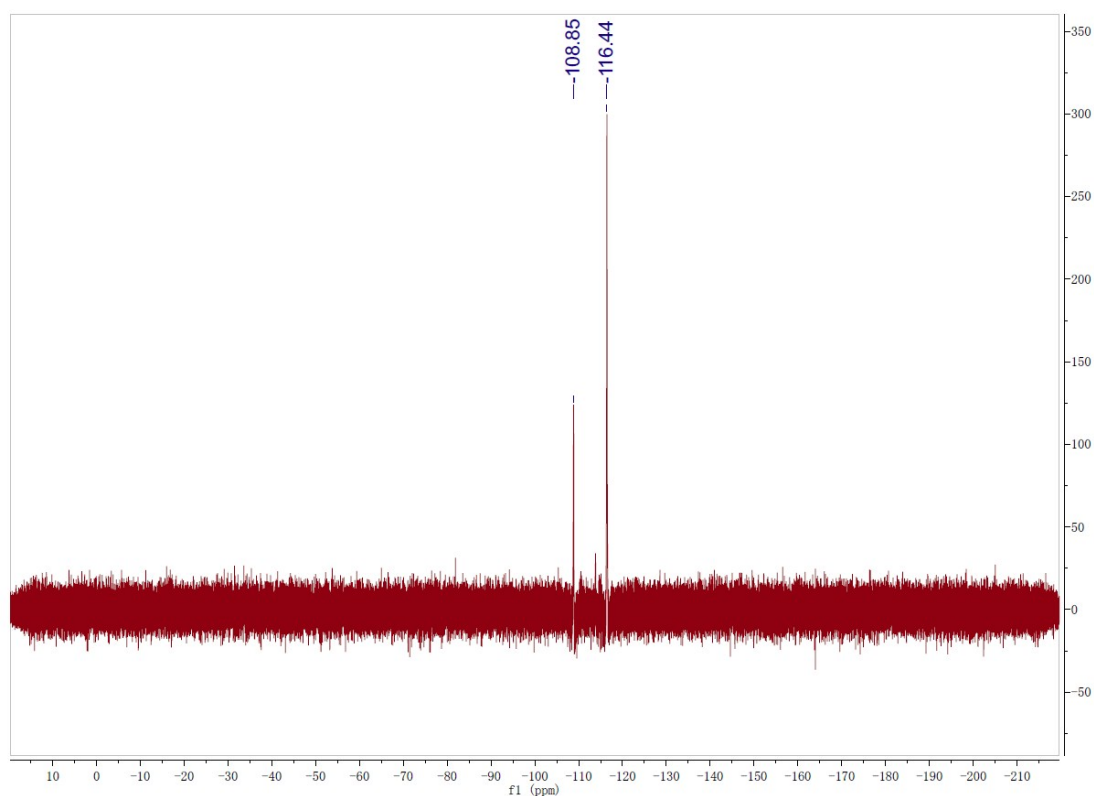

Note: Complexes **13a** and **13b** were synthesized in diethyl ether and crystallized in *n*-pentane.  $^{19}\text{F}$  {H} NMR (282.4 MHz,  $\text{C}_6\text{D}_6$ , 298 K, ppm):  $\delta$  -108.8, 116.4 (s, F, Ar-F).

$^{31}\text{P}$  {H} NMR spectrum ( $\text{C}_6\text{D}_6$ )

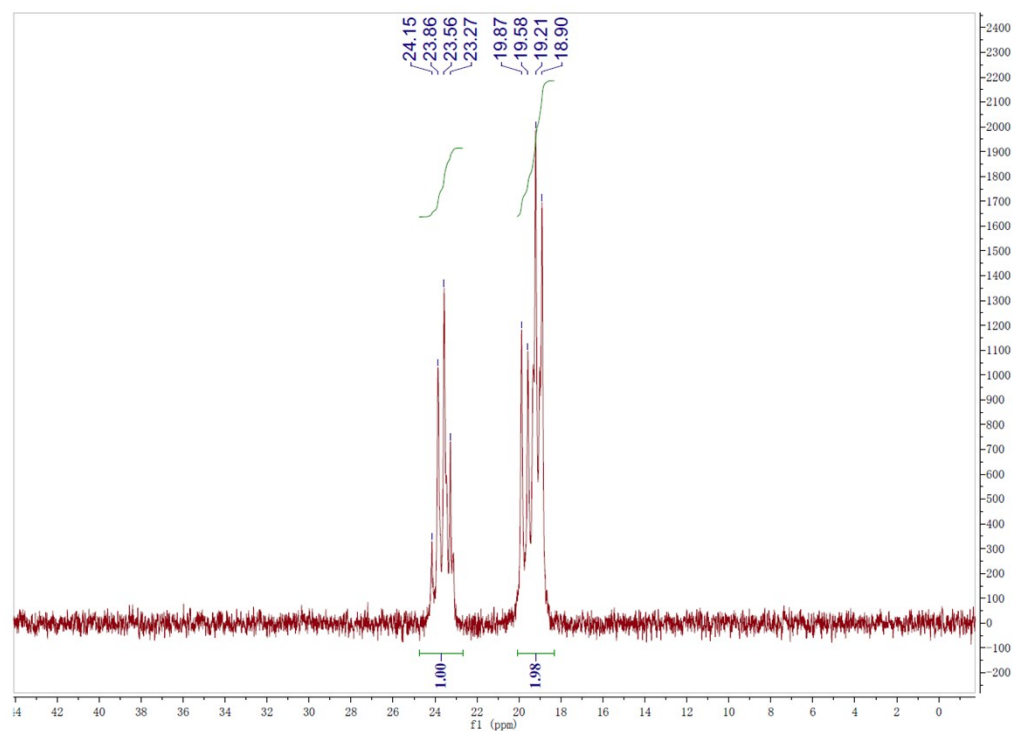

Note: **13a** and **13b**:  $^{31}\text{P}$  NMR (121.5 MHz,  $\text{C}_6\text{D}_6$ , 298 K, ppm):  $\delta$  24.1, 23.8 (t,  $^2J_{\text{P,P}} = 36.4$  Hz, 1 P,  $\text{P}(\text{CH}_3)_3$ ), 19.9, 19.2 (d,  $^2J_{\text{P,P}} = 36.4$  Hz, 2 P,  $\text{P}(\text{CH}_3)_3$ ).

## Complex 14

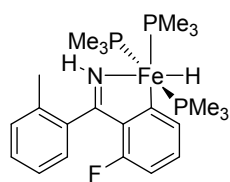

### IR spectrum

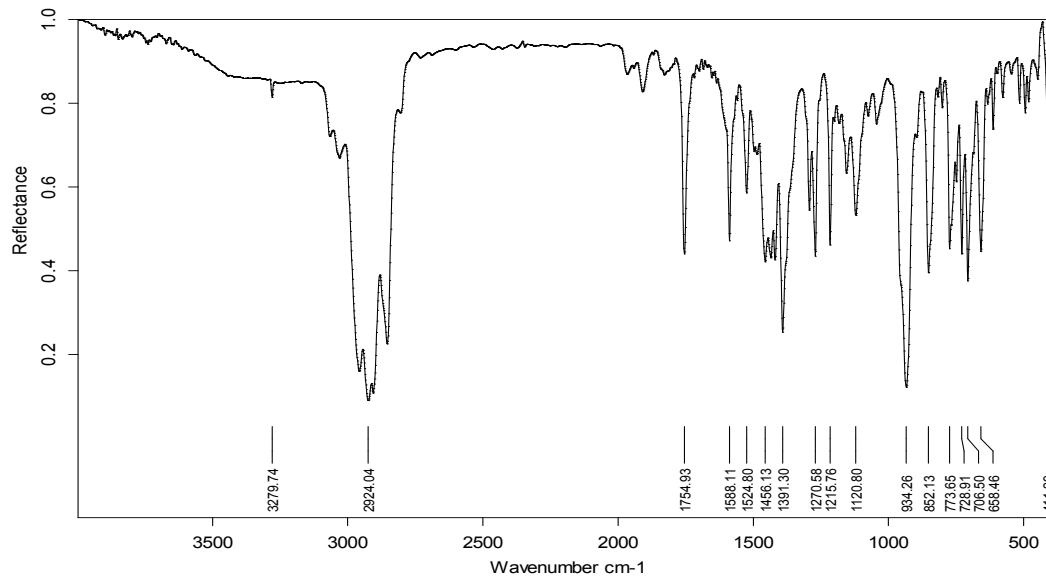

### <sup>1</sup>H NMR spectrum (C<sub>6</sub>D<sub>6</sub>)

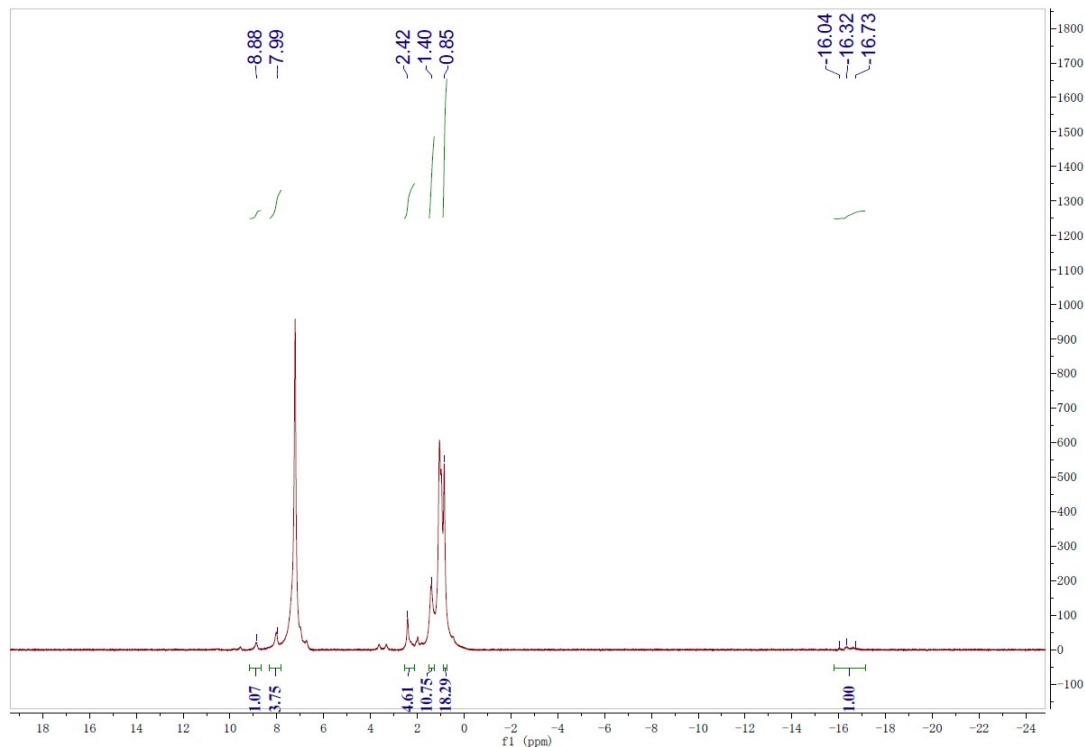

Note: Complex 14 was synthesized in diethyl ether and crystallized in n-pentane.

$^{19}\text{F}$  {H} NMR spectrum ( $\text{C}_6\text{D}_6$ )

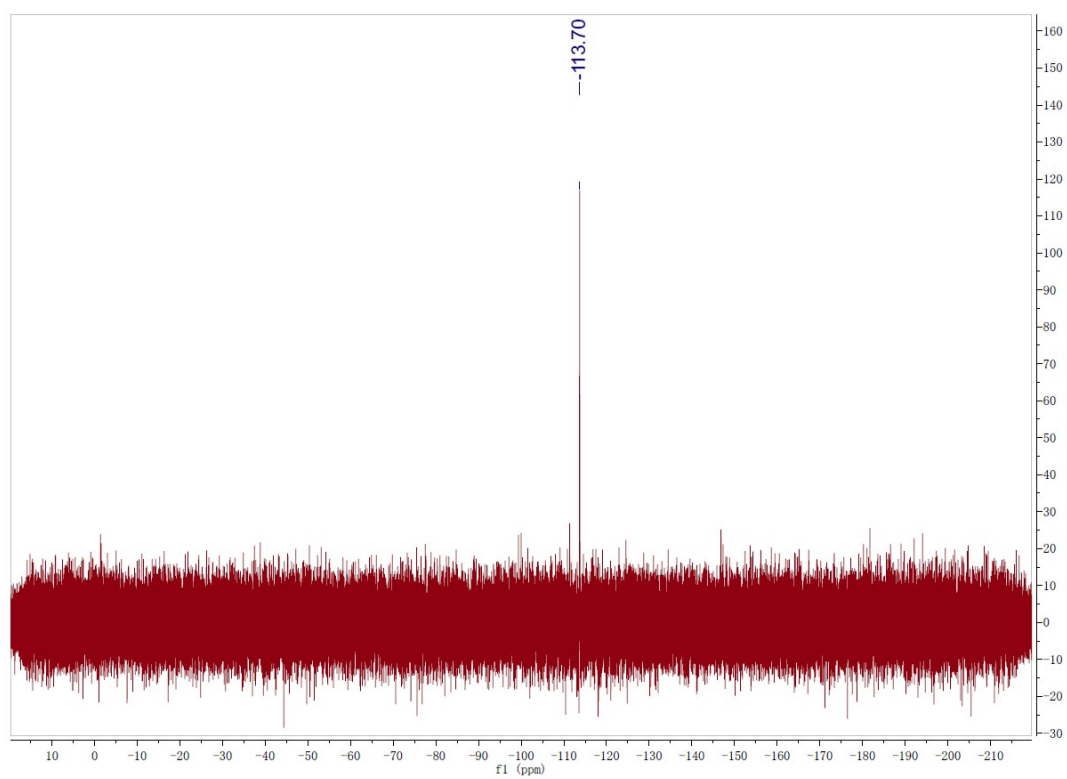

Note: Complex **14** was synthesized in diethyl ether and crystallized in *n*-pentane.

$^{31}\text{P}$  {H} NMR spectrum ( $\text{C}_6\text{D}_6$ )

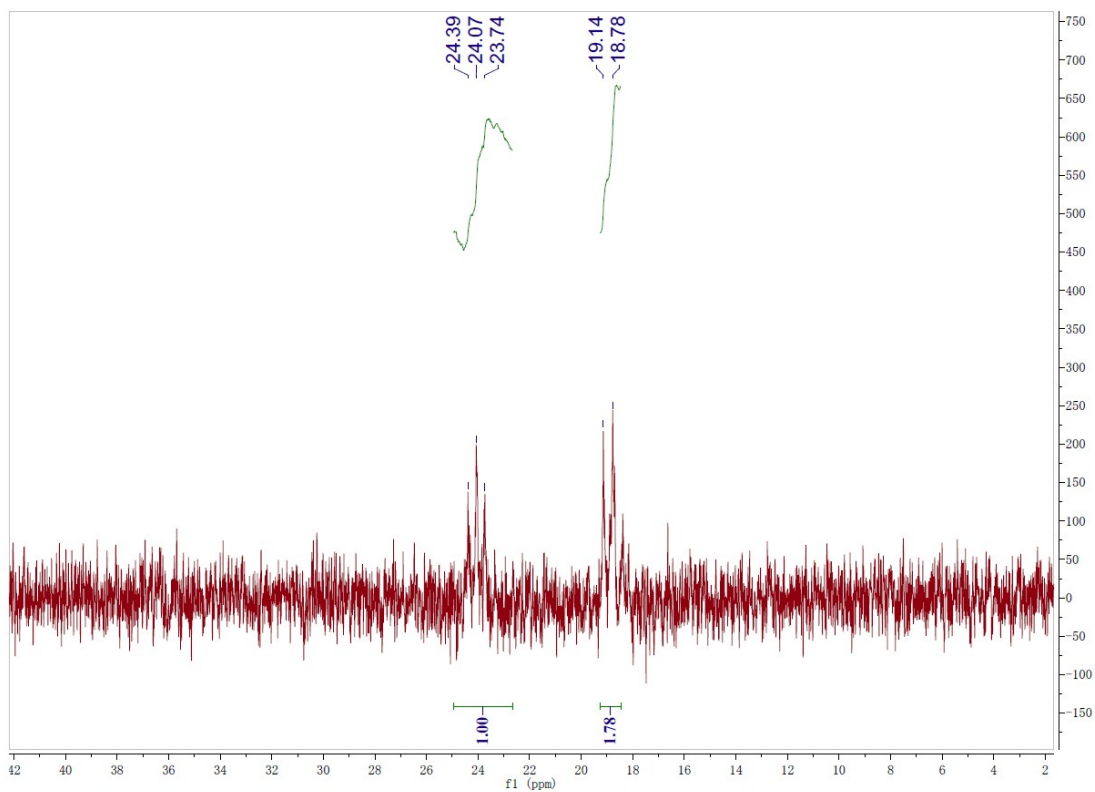

Note: Complex **14** was synthesized in diethyl ether and crystallized in *n*-pentane.

## Complex 15

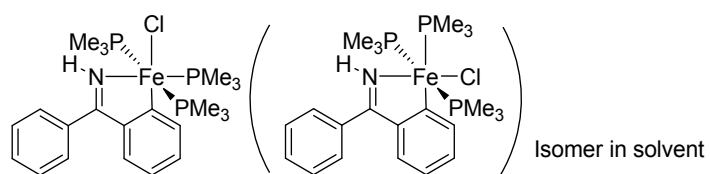

### IR spectrum

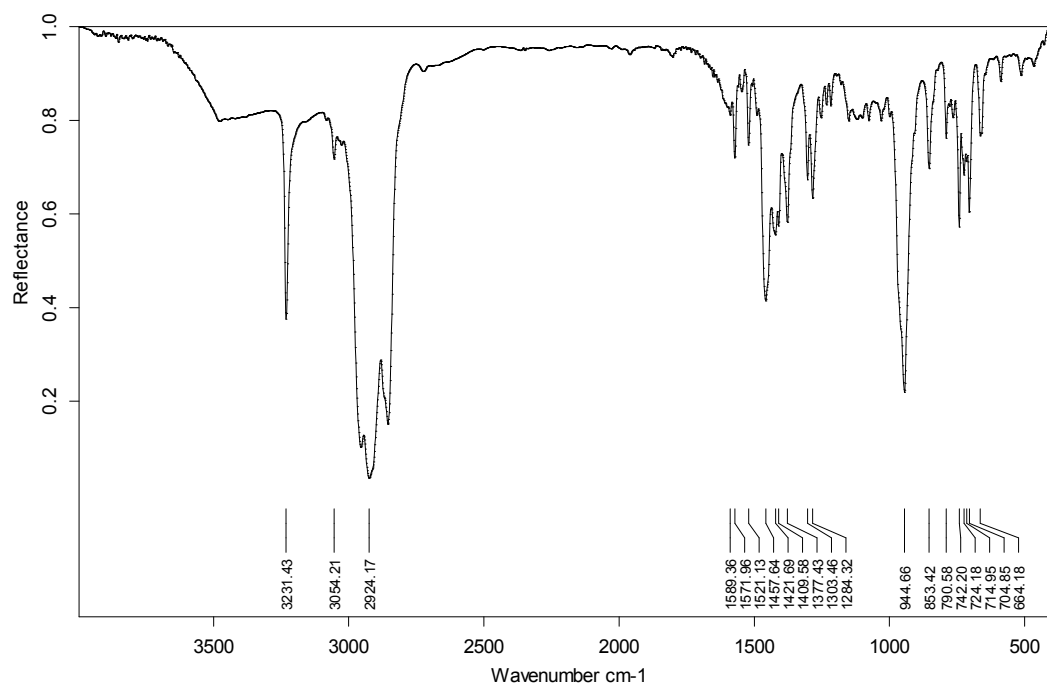

### <sup>1</sup>H NMR spectrum (C<sub>6</sub>D<sub>6</sub>)

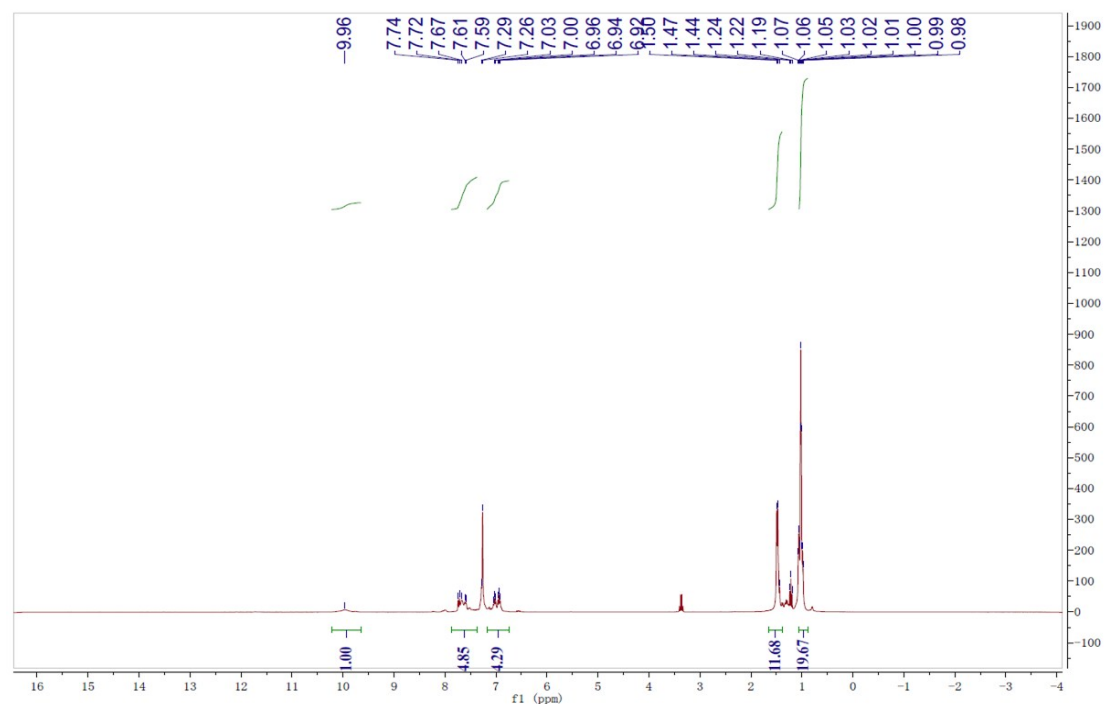

Note: Complex **15** was synthesized in diethyl ether. The signals at 3.4 ppm and 1.2 ppm are the typical signals of solvent.

$^{31}\text{P} \{^1\text{H}\}$  NMR spectrum ( $\text{C}_6\text{D}_6$ )

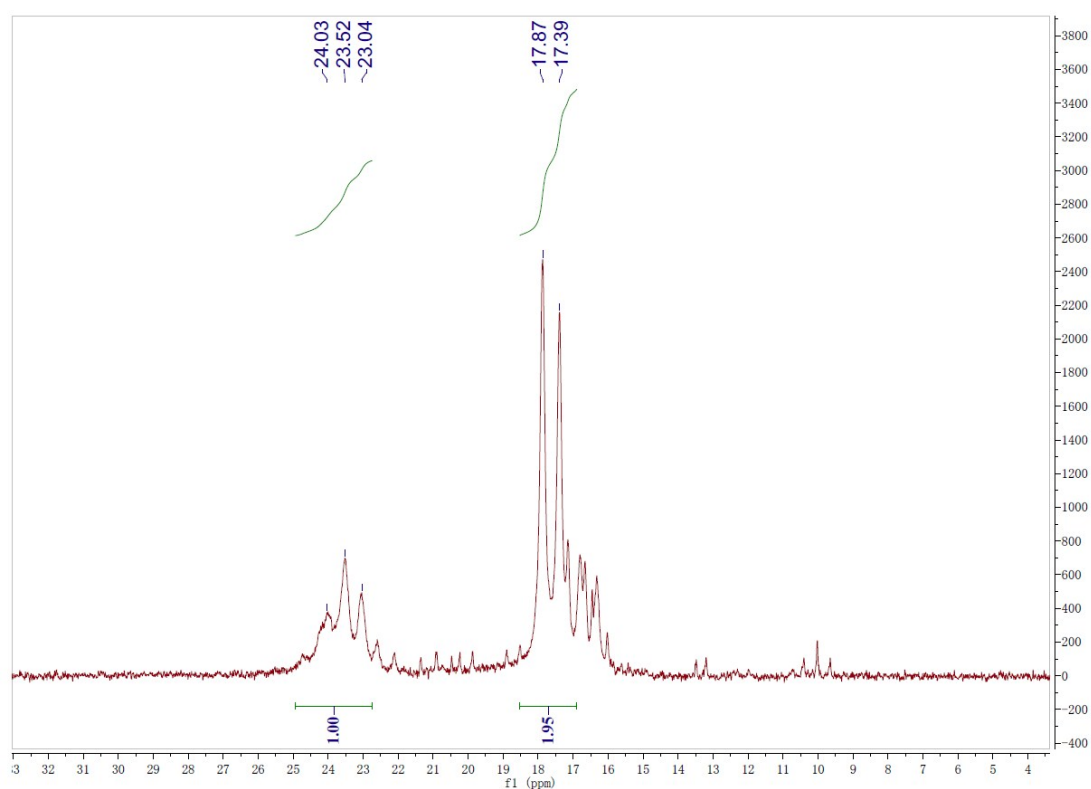

Note: Complex **15** was synthesized in diethyl ether. The signal at 16 ppm is the arrangement isomer of complex **15**.

$^{13}\text{C} \{^1\text{H}\}$  NMR spectrum ( $\text{C}_6\text{D}_6$ )

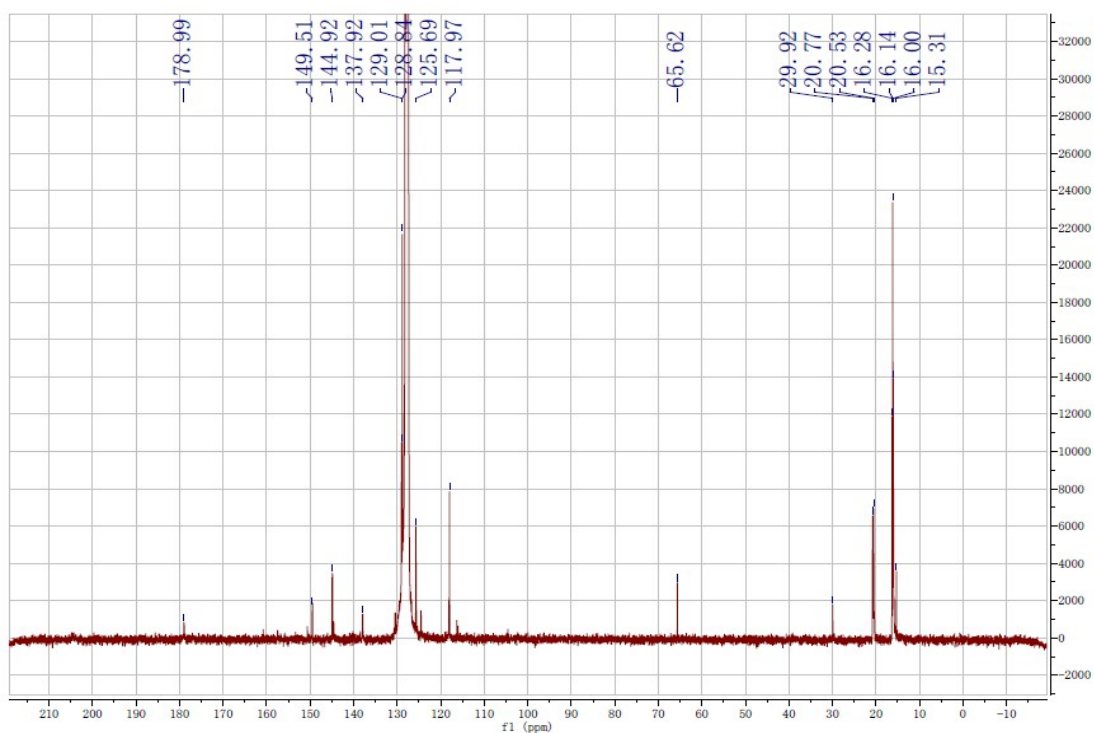

Note: Complex **15** was synthesized in diethyl ether. The signals at 3.4 ppm and 1.2 ppm are the typical signals of solvent. The signals of  $\text{Et}_2\text{O}$  appear at 15 and 65 ppm.

## Complex 16

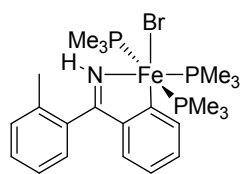

## IR spectrum

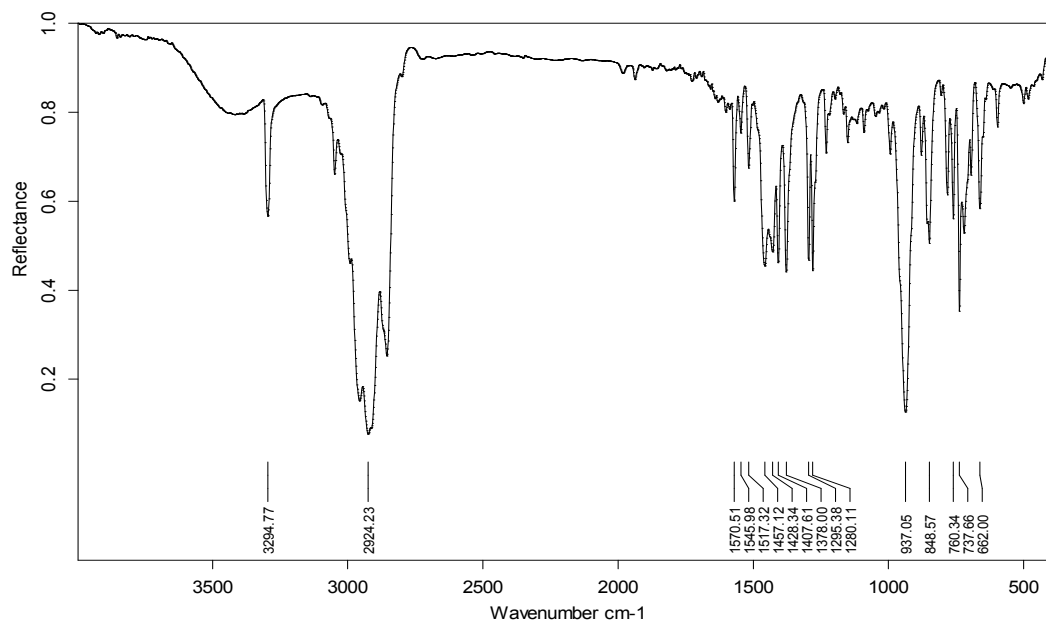

## <sup>1</sup>H NMR spectrum (C<sub>6</sub>D<sub>6</sub>)

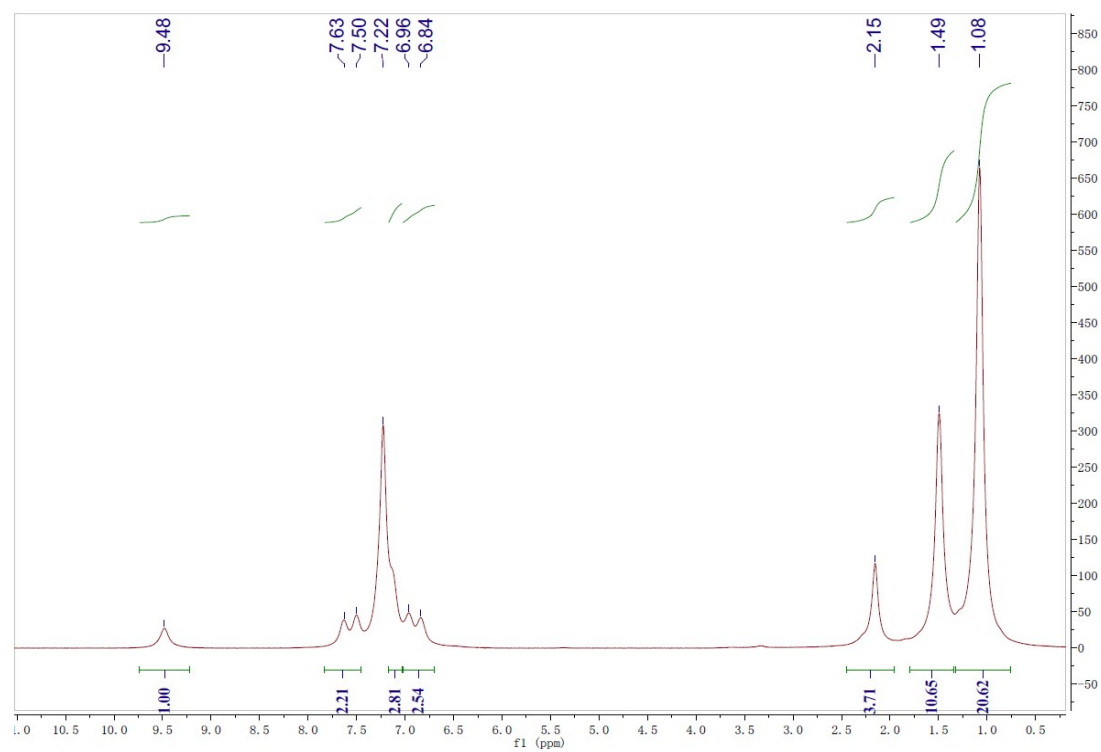

Note: Complex 16 was synthesized in diethyl ether.

$^{31}\text{P} \{^1\text{H}\}$  NMR spectrum ( $\text{C}_6\text{D}_6$ )

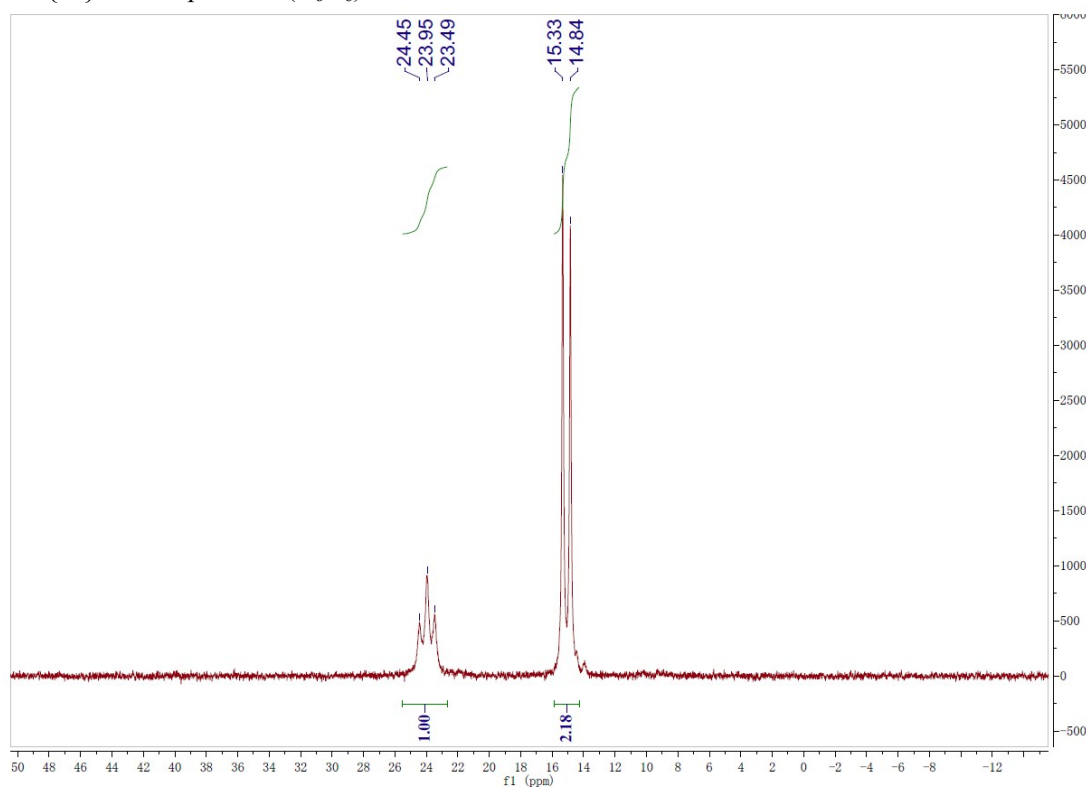

Note: Complex **16** was synthesized in diethyl ether.

$^{13}\text{C} \{^1\text{H}\}$  NMR spectrum ( $\text{C}_6\text{D}_6$ )

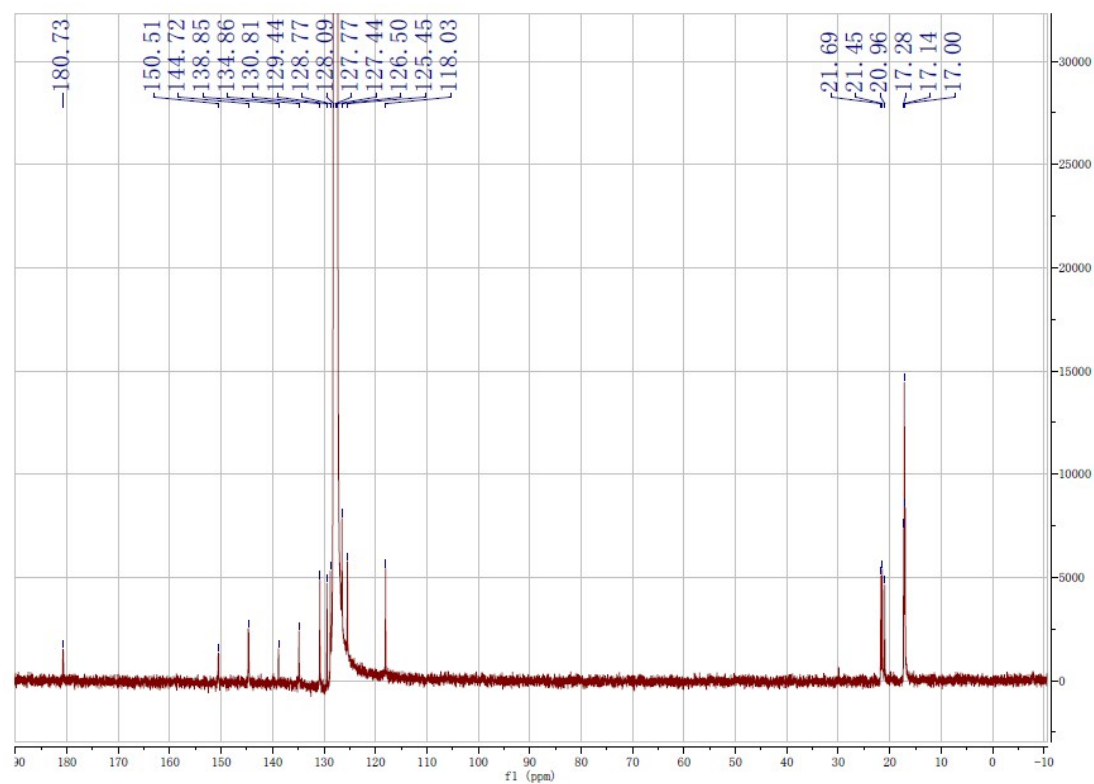

Note: Complex **16** was synthesized in diethyl ether.

### Complex 17

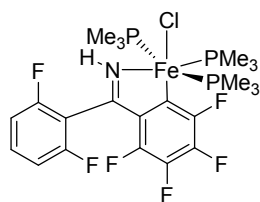

### IR spectrum

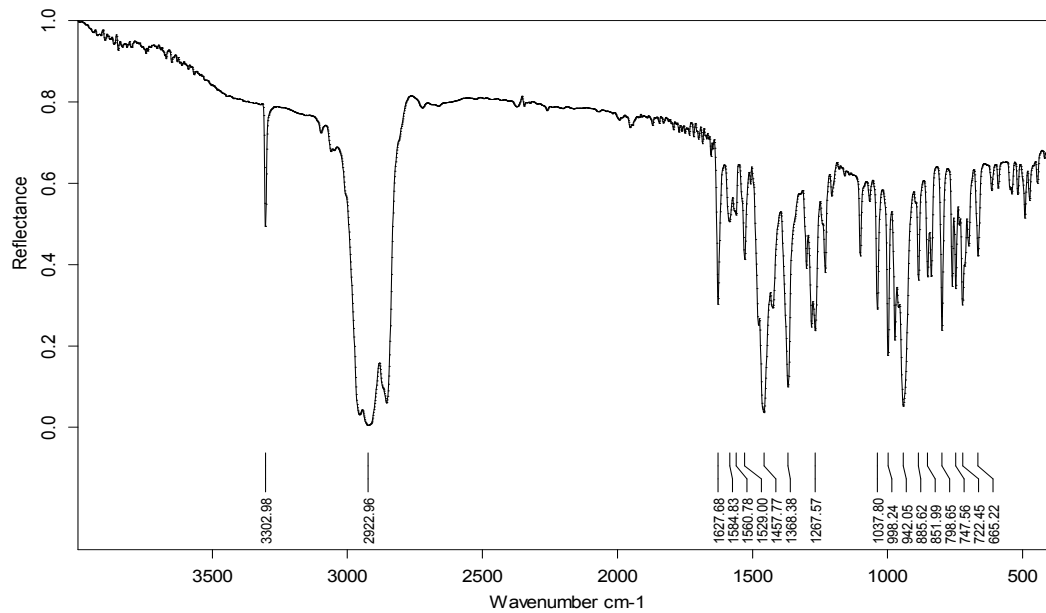

### <sup>1</sup>H NMR spectrum (C<sub>6</sub>D<sub>6</sub>)

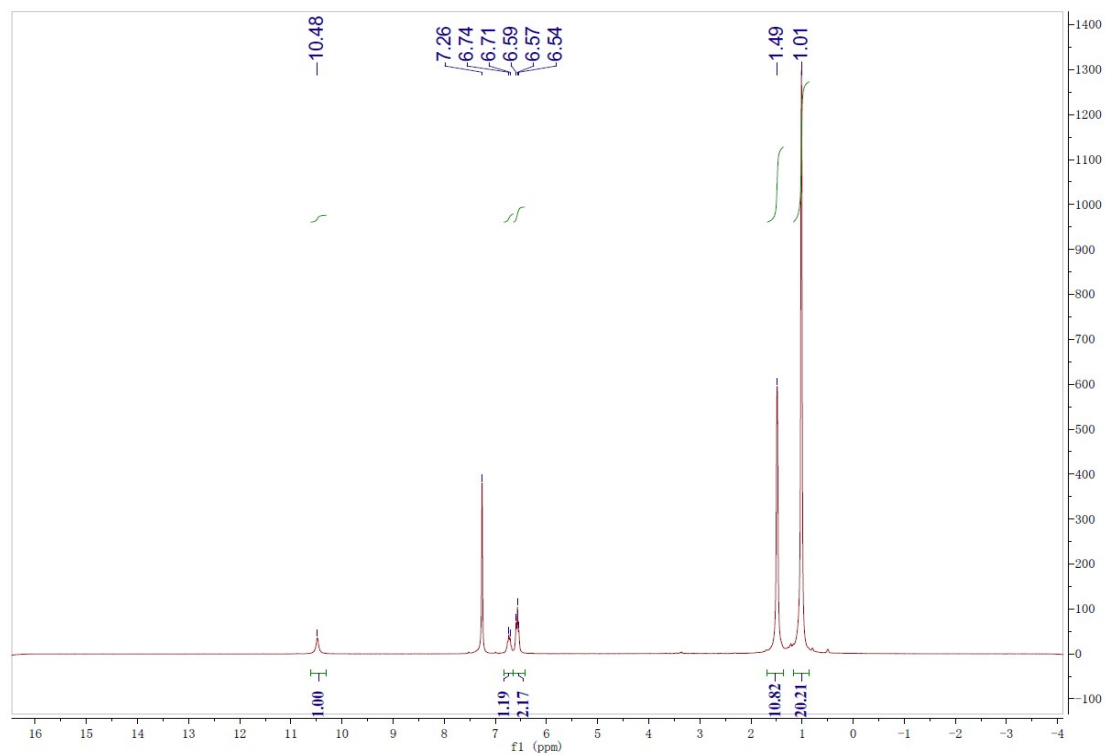

Note: Complex 17 was synthesized in diethyl ether.



$^{19}\text{F}$  {H} NMR spectrum ( $\text{C}_6\text{D}_6$ )

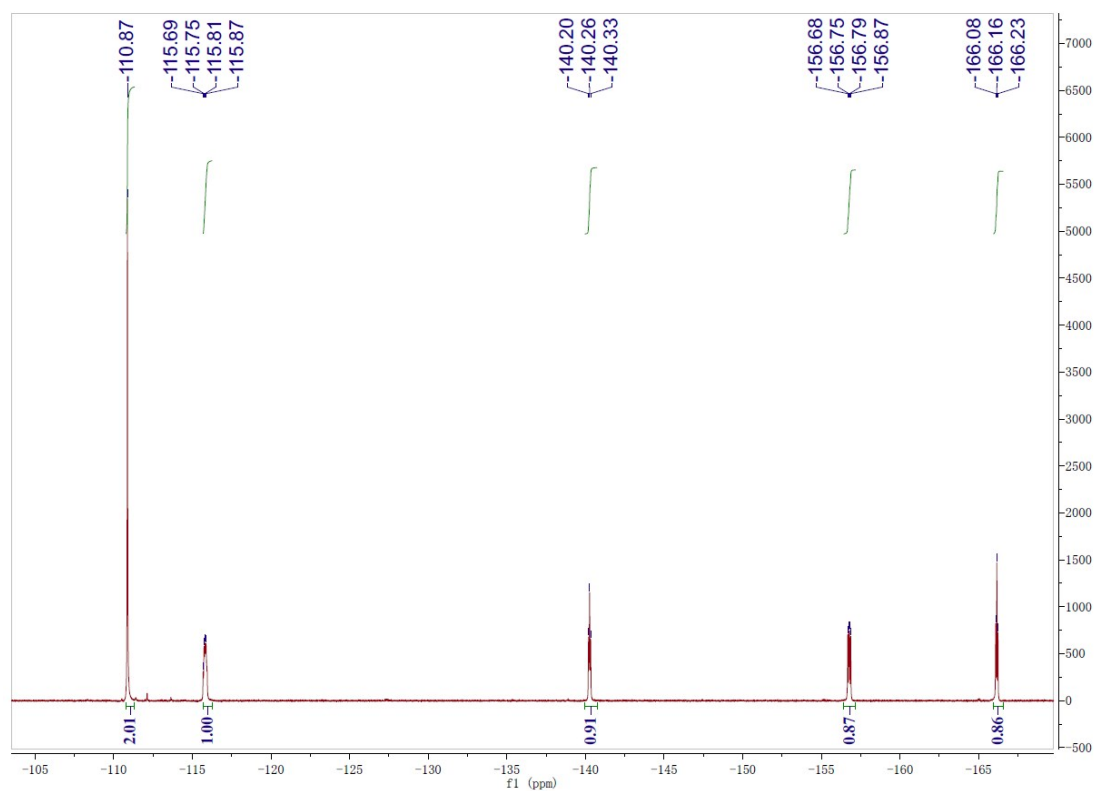

Note: Complex **17** was synthesized in diethyl ether.

$^{31}\text{P}$  {H} NMR spectrum ( $\text{C}_6\text{D}_6$ )

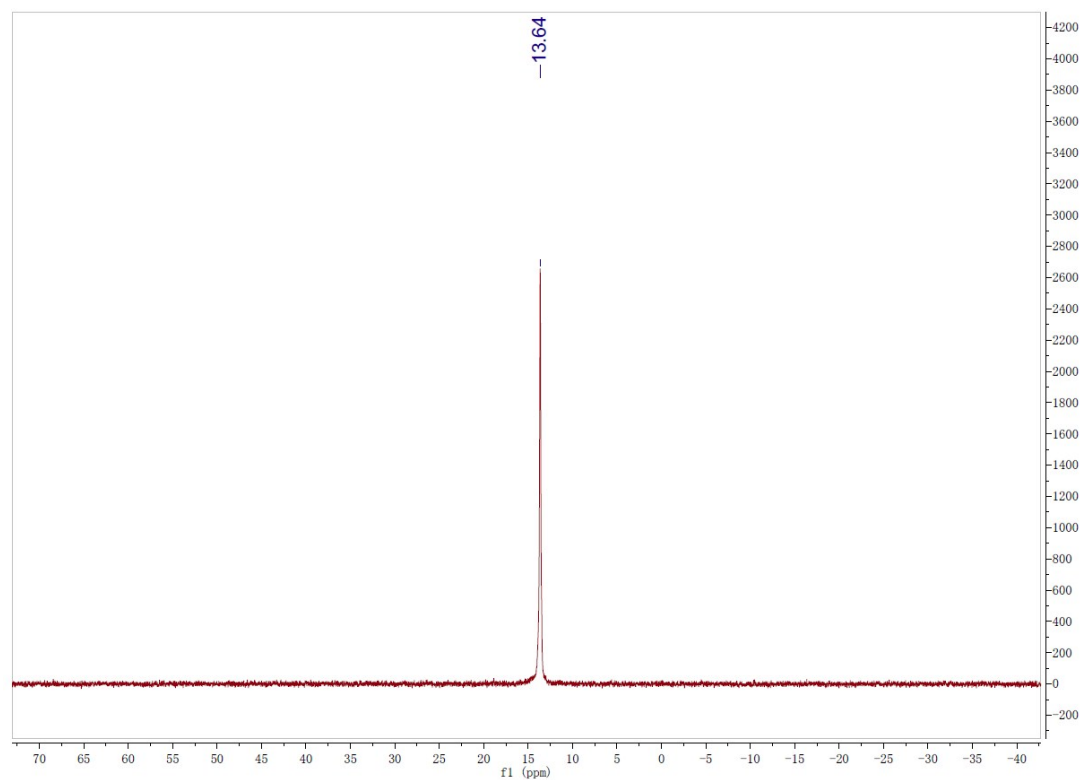

Note: Complex **17** was synthesized in diethyl ether.

$^{13}\text{C}$  {H} NMR spectrum ( $\text{C}_6\text{D}_6$ )

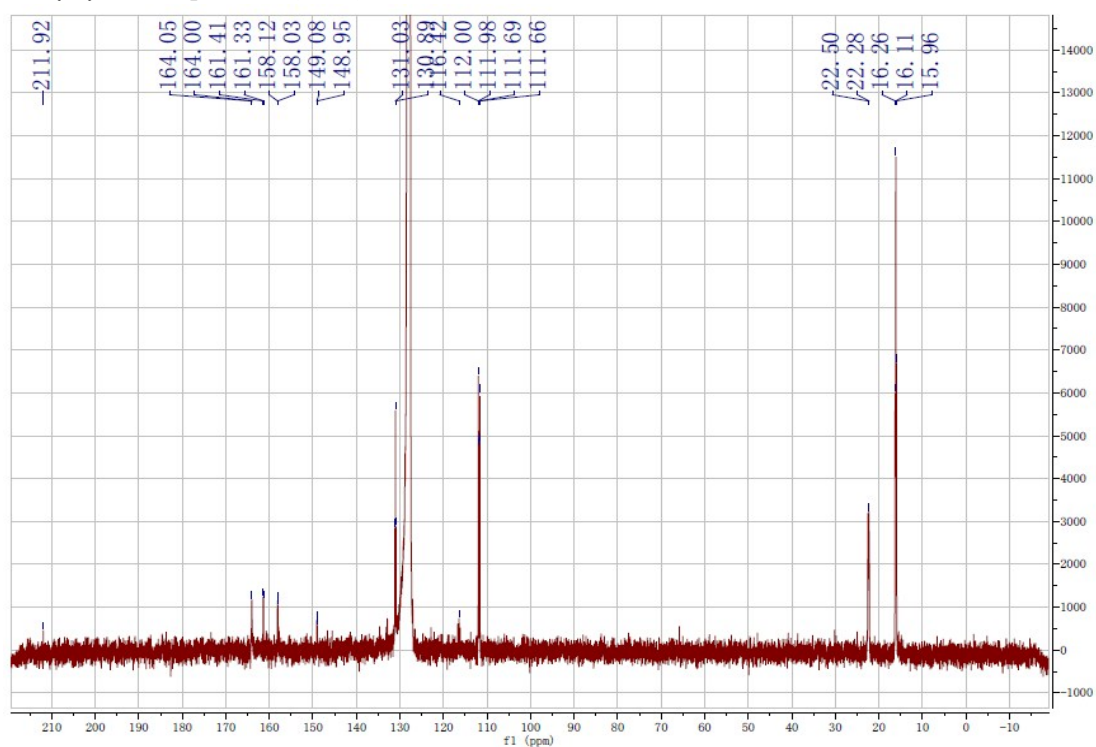

Note: Complex **17** was synthesized in diethyl ether.

### Complex 18

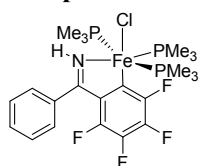

IR spectrum

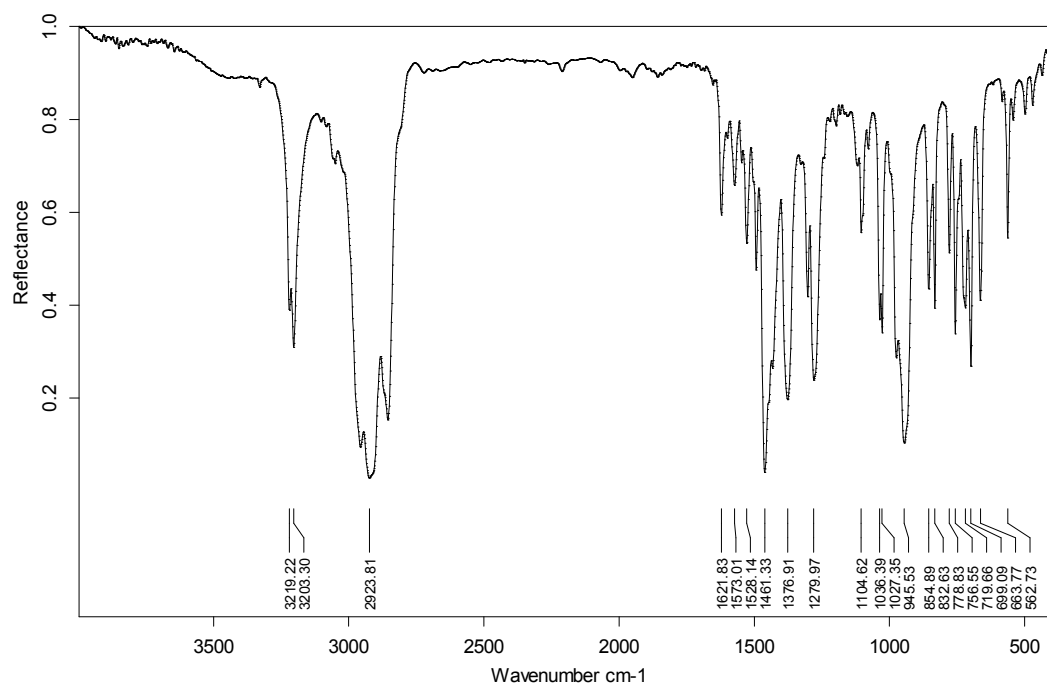

$^1\text{H}$  NMR spectrum ( $\text{C}_6\text{D}_6$ )

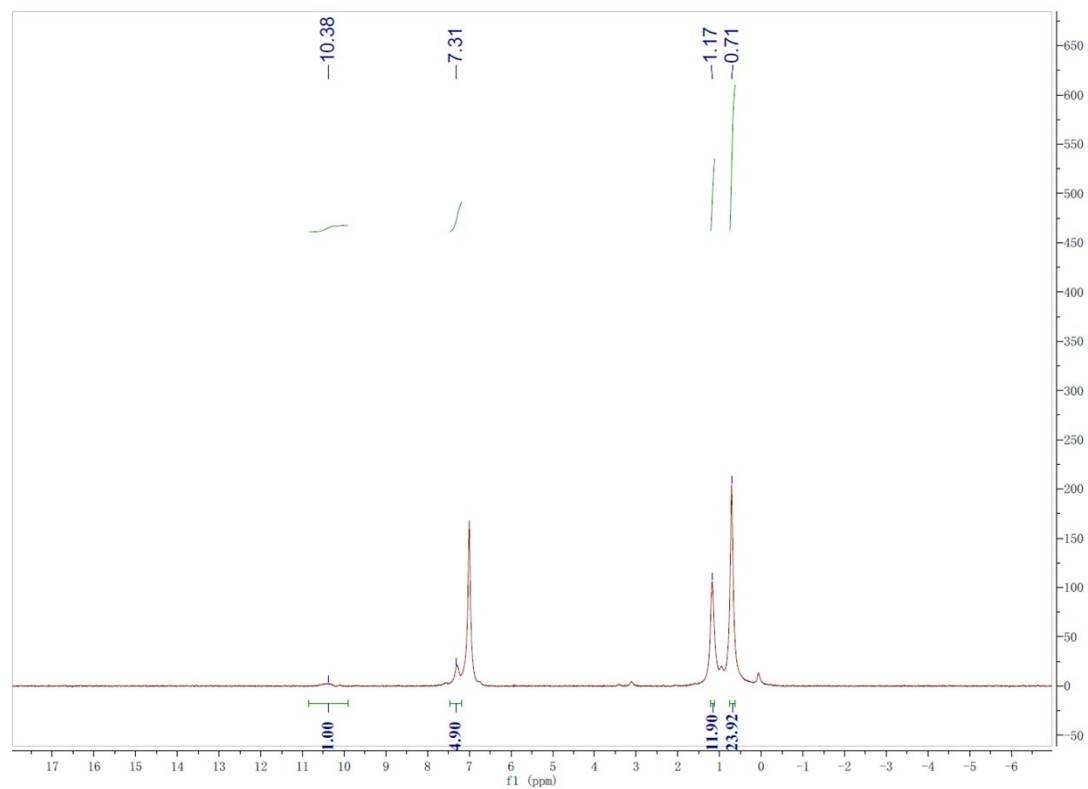

Note: Complex **18** was synthesized in diethyl ether.

$^{19}\text{F}$  { $^1\text{H}$ } NMR spectrum ( $\text{C}_6\text{D}_6$ )

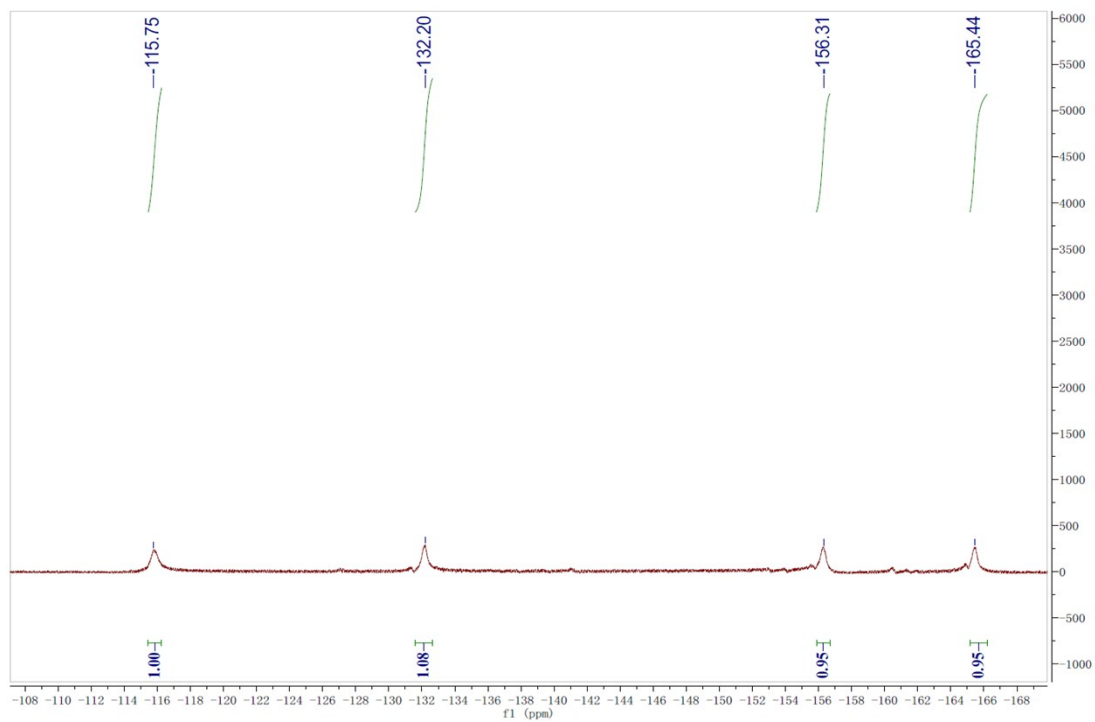

Note: Complex **18** was synthesized in diethyl ether.

$^{31}\text{P} \{^1\text{H}\}$  NMR spectrum ( $\text{C}_6\text{D}_6$ )

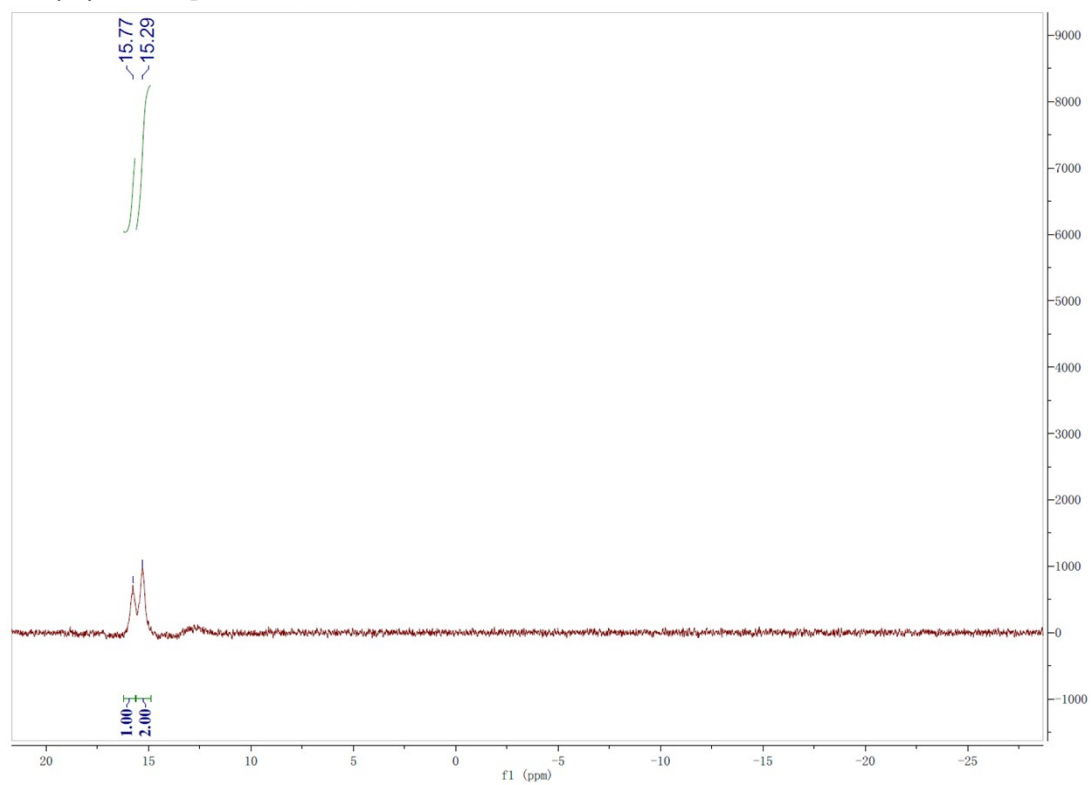

Note: Complex **18** was synthesized in diethyl ether.

#### SIV. $^1\text{H}$ NMR spectra of Alcohol Products

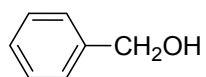

$^1\text{H}$  NMR (300 MHz,  $\text{CDCl}_3$ ,  $\delta$ ): 7.26–7.39 (m, *Ar*, 5H), 4.62 (s,  $\text{CH}_2$ , 2H), 2.70 (s, *OH*, 1H).

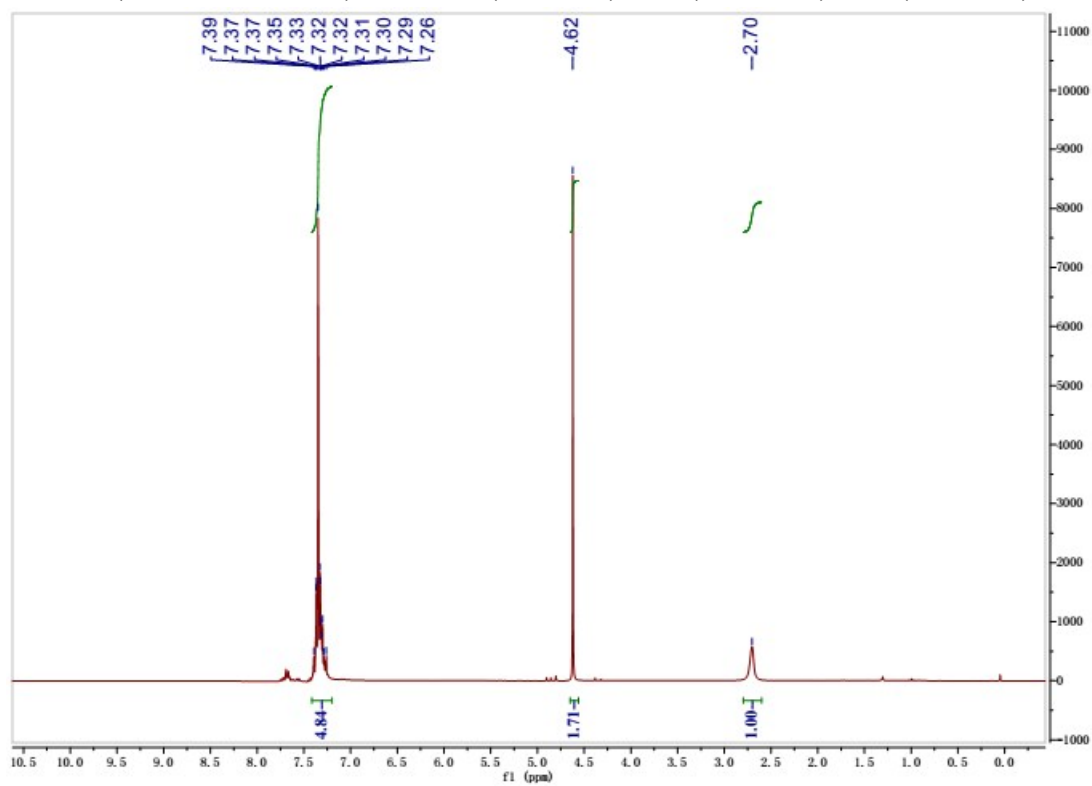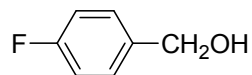

$^1\text{H}$  NMR (300 MHz,  $\text{CDCl}_3$ ,  $\delta$ ): 6.97–7.28 (m, *Ar*, 4H), 4.55 (s,  $\text{CH}_2$ , 2H), 2.82 (s, *OH*, 1H).

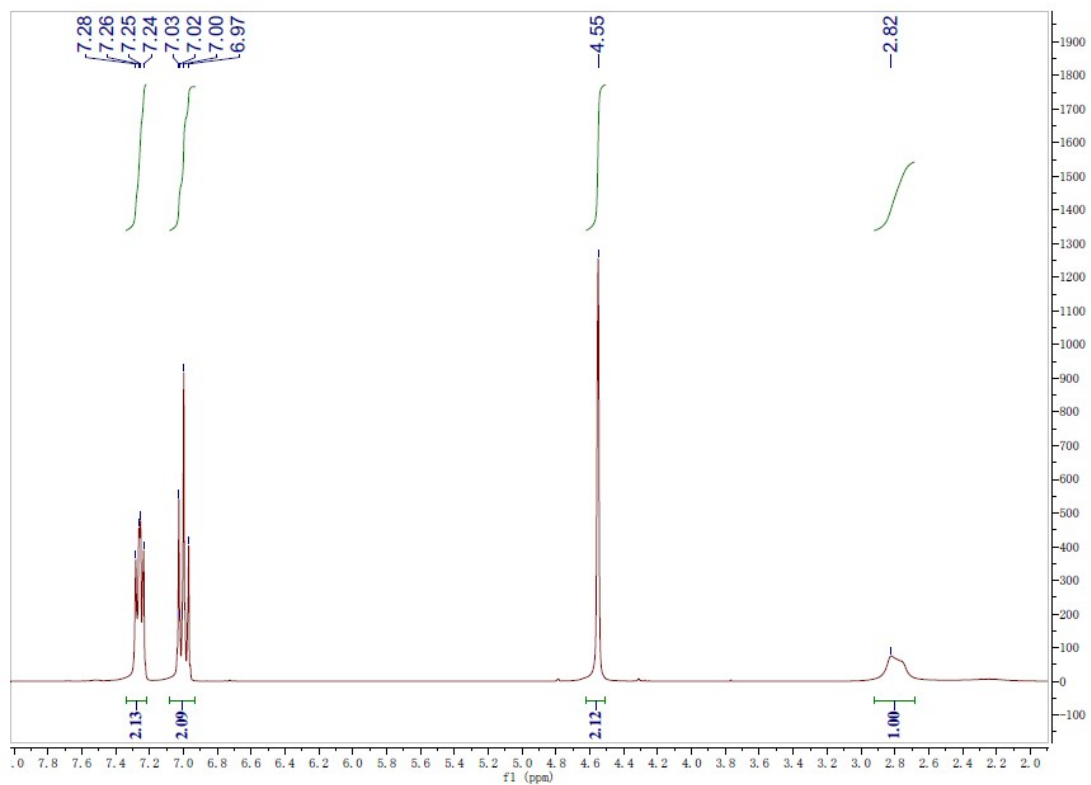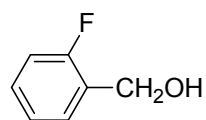

$^1\text{H}$  NMR (300 MHz, CDCl<sub>3</sub>,  $\delta$ ): 7.33–6.91 (m, *Ar*, 4H), 4.61 (s, CH<sub>2</sub>, 2H), 2.89 (s, OH, 1H).

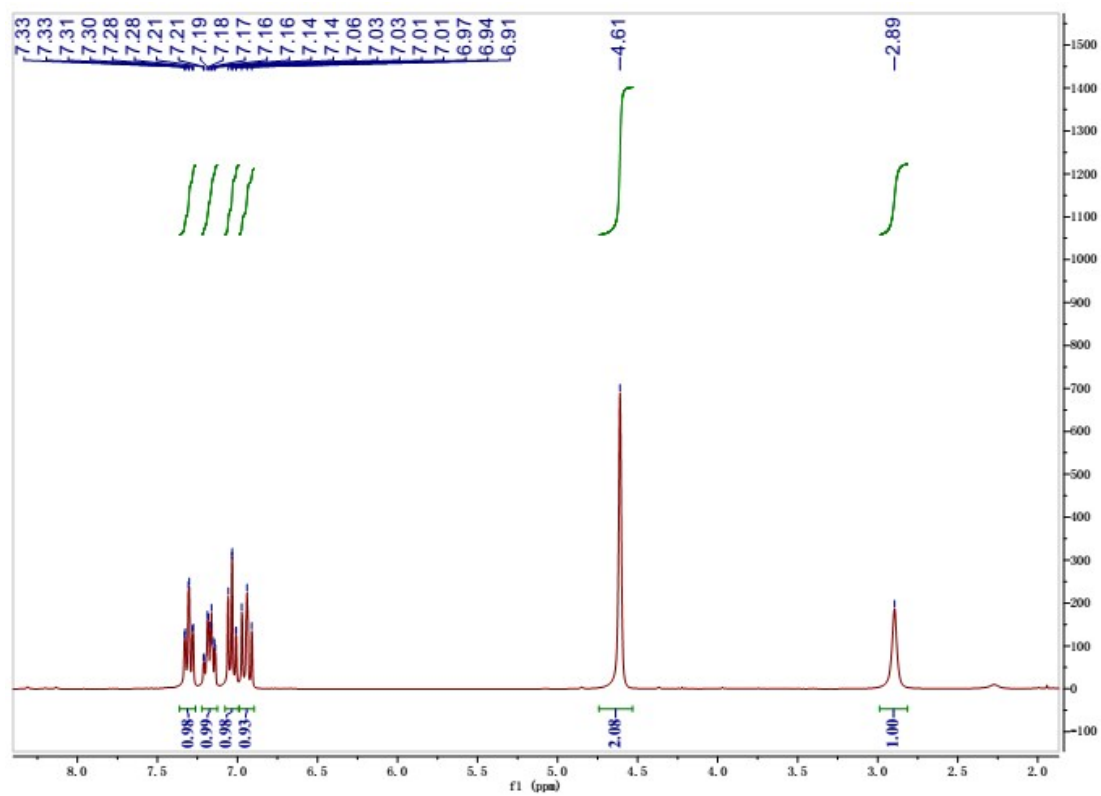

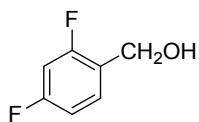

$^1\text{H NMR}$  (300 MHz,  $\text{CDCl}_3$ ,  $\delta$ ): 7.23–7.06 (m, *Ar*, 3H), 4.53 (s,  $\text{CH}_2$ , 2H), 2.95 (s, *OH*, 1H).

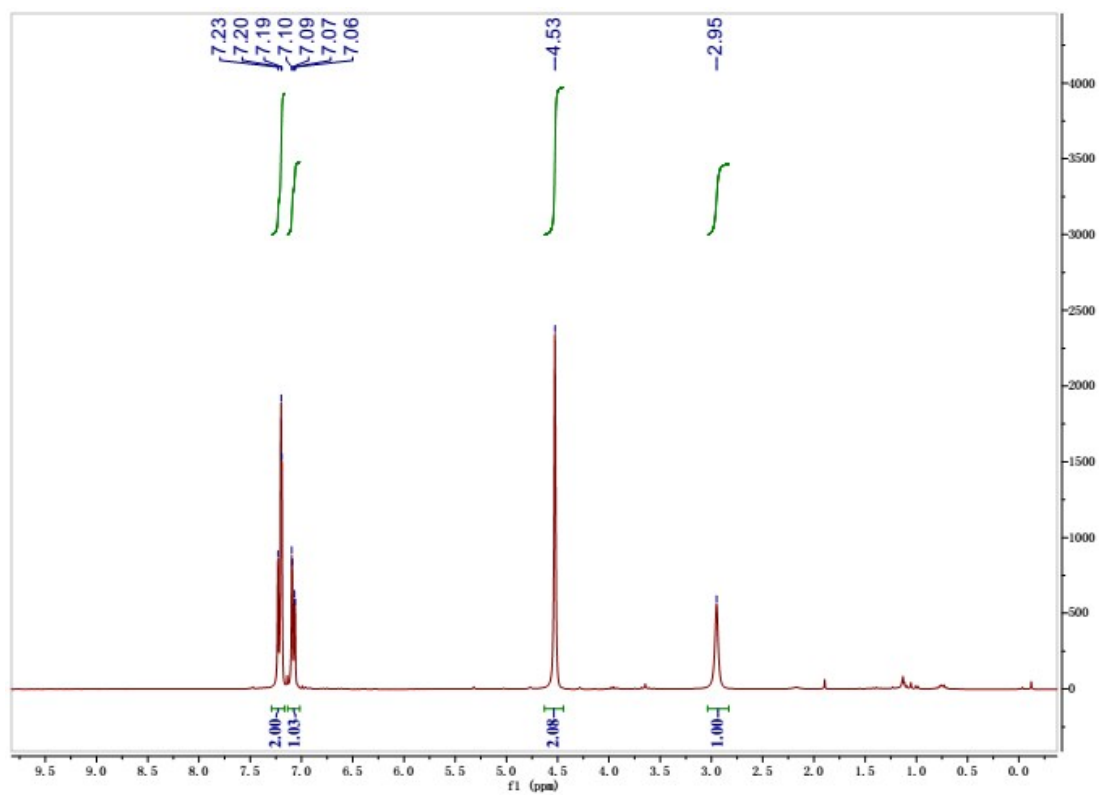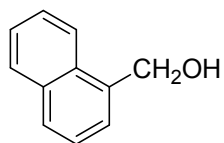

$^1\text{H NMR}$  (300 MHz,  $\text{CDCl}_3$ ,  $\delta$ ): 7.41–8.09 (m, *Ar*, 7H), 5.08 (s,  $\text{CH}_2$ , 2H), 2.01 (s, *OH*, 1H).

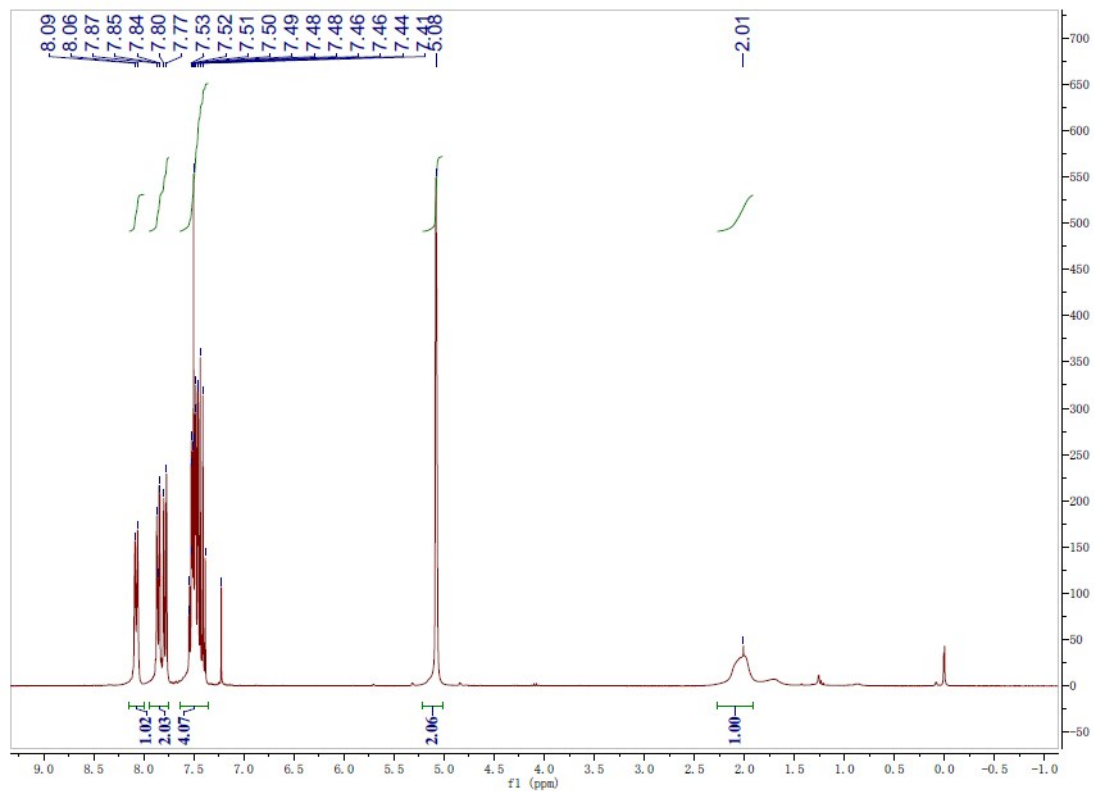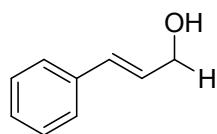

$^1\text{H}$  NMR (300 MHz,  $\text{CDCl}_3$ ,  $\delta$ ): 7.23–7.09 (m, *Ar*, 5H), 6.44 (d, *HC=C*, 1H), 6.18 (m, *C=CH*, 1H), 4.14 (d, *CH<sub>2</sub>*, 2H), 2.45 (s, *OH*, 1H).



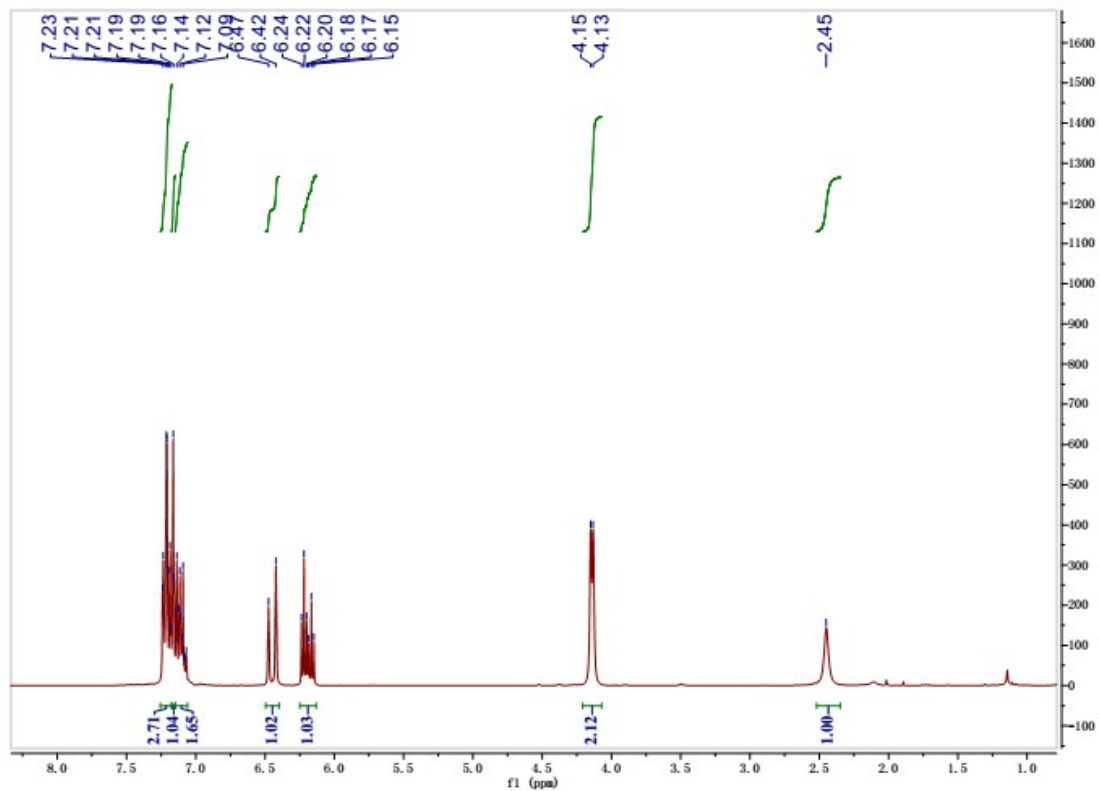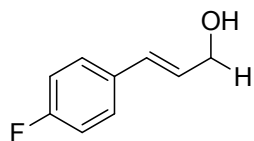

$^1\text{H}$  NMR (300 MHz,  $\text{CDCl}_3$ ,  $\delta$ ): 7.34-6.97 (m, *Ar*, 4H), 6.55 (d, *HC=C*, 1H), 6.24 (m, *C=CH*, 1H), 4.30 (dd, *CH<sub>2</sub>*, 2H), 1.72 (s, *OH*, 1H).

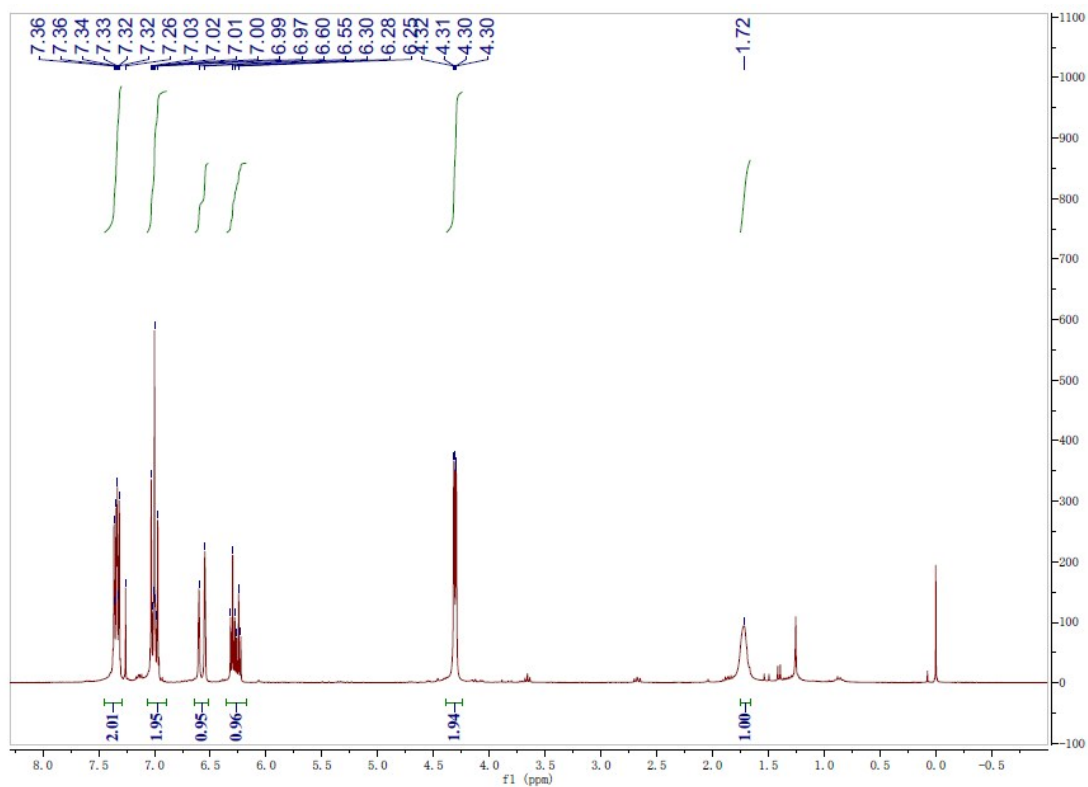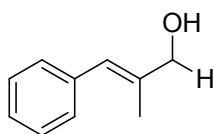

$^1\text{H}$  NMR (300 MHz,  $\text{CDCl}_3$ ,  $\delta$ ): 7.30-7.13 (m, *Ar*, 5H), 6.47 (d, *HC=C*, 1H), 4.10 (s,  $\text{CH}_2$ , 2H), 2.71 (s, *OH*, 1H), 1.83 (s,  $\text{CH}_3$ , 3H)

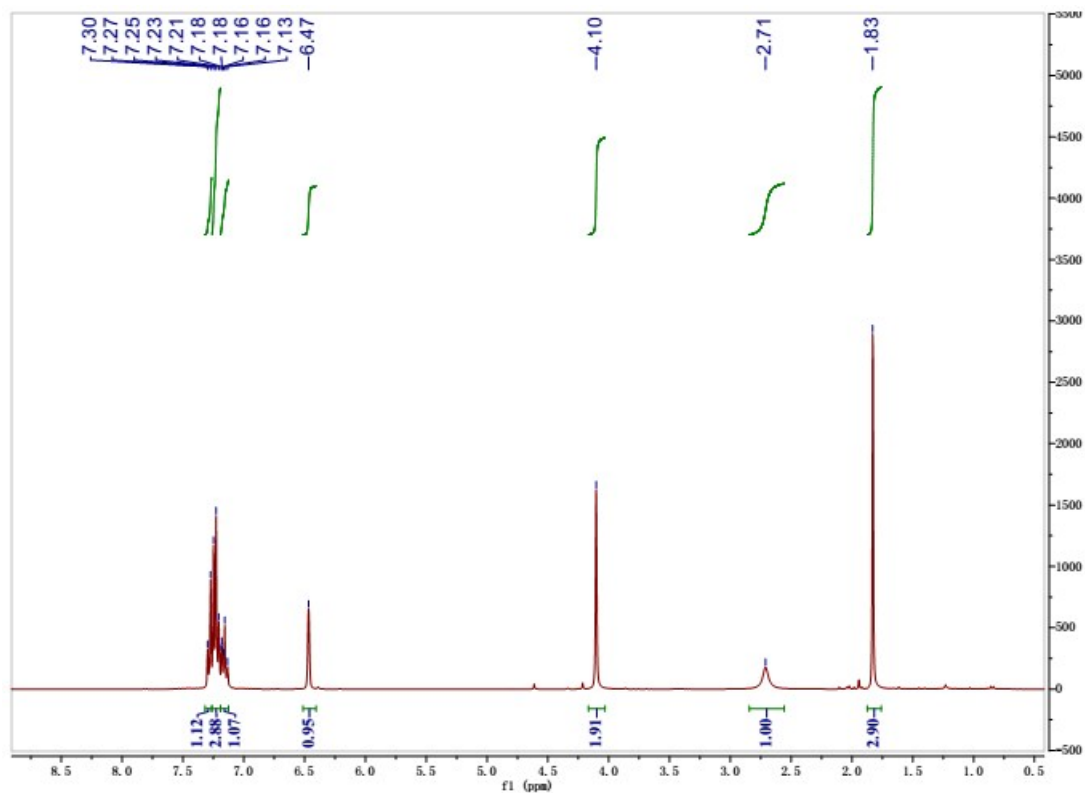

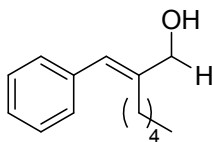

$^1\text{H NMR}$  (300 MHz,  $\text{CDCl}_3$ ,  $\delta$ ): 7.34-7.21 (m, *Ar*, 5H), 6.52 (d, *HC=C*, 1H), 4.21 (s,  $\text{CH}_2$ , 2H), 2.28 (m,  $\text{CH}_2$ , 2H), 1.90 (s, *OH*, 1H), 1.51 (m,  $\text{CH}_2$ , 2H), 1.29 (m,  $\text{CH}_2$ , 4H), 0.86 (t,  $\text{CH}_3$ , 3H)

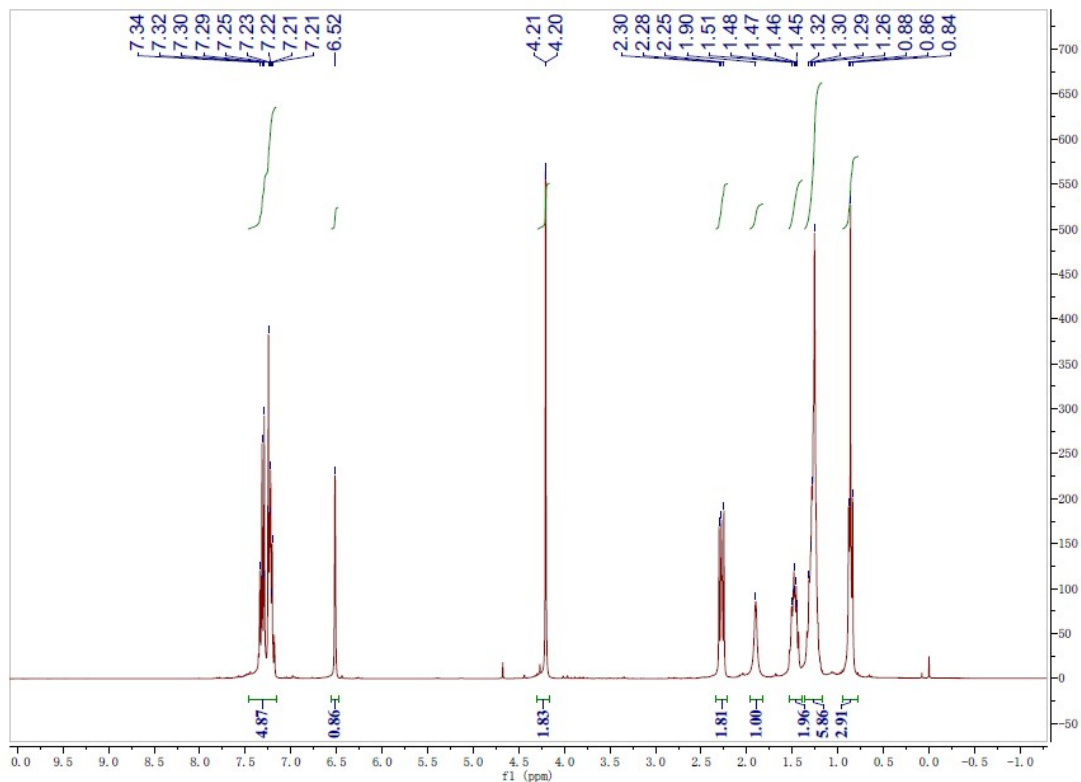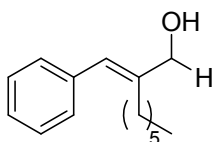

$^1\text{H NMR}$  (300 MHz,  $\text{CDCl}_3$ ,  $\delta$ ): 7.30-7.14 (m, *Ar*, 5H), 6.48 (d, *HC=C*, 1H), 4.17 (s,  $\text{CH}_2$ , 2H), 2.24 (m,  $\text{CH}_2$ , 2H), 1.43 (m,  $\text{CH}_2$ , 2H), 1.24 (m,  $\text{CH}_2$ , 6H), 0.83 (t,  $\text{CH}_3$ , 3H)

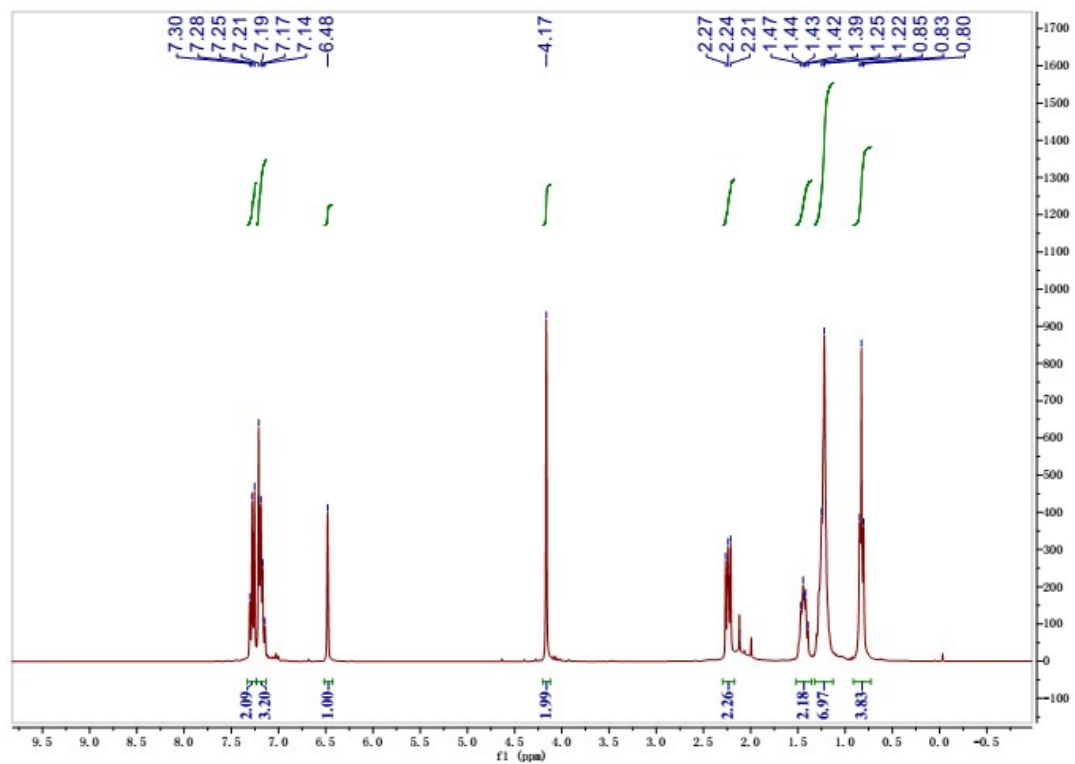

## SV General Procedure of the Operando IR Experiment.

1 mL THF was charged into a two-necked Schlenk tube which had been connected with the Schlenk line. Through an adapter, the test probe was emerged into the solution. At the beginning, the operando IR spectrometer recorded the solvent signal for 10 min. After 5 min, 4-FC<sub>6</sub>H<sub>4</sub>CHO (0.17 g, 1.37 mmol) was added into the container. At the 10<sup>th</sup> minute, 1 mL THF solution of complex **15** (0.14 g, 0.27 mmol) was added into the mixture and the reaction container was heated to 55 °C. The mixture was kept stirring at this temperature for 15 min. During that period, the IR absorption (1709 cm<sup>-1</sup>) for C=O bond of 4-FC<sub>6</sub>H<sub>4</sub>CHO maintained unchanged. At the 28<sup>th</sup> minute, the HSi(OCH<sub>2</sub>CH<sub>3</sub>)<sub>3</sub> (0.26 g, 1.6 mmol) was added. The operando IR spectra were continually recorded until the reaction was completed. The signal of C=O bond disappeared immediately and the one of C-O bond (1039 cm<sup>-1</sup>) grew up.

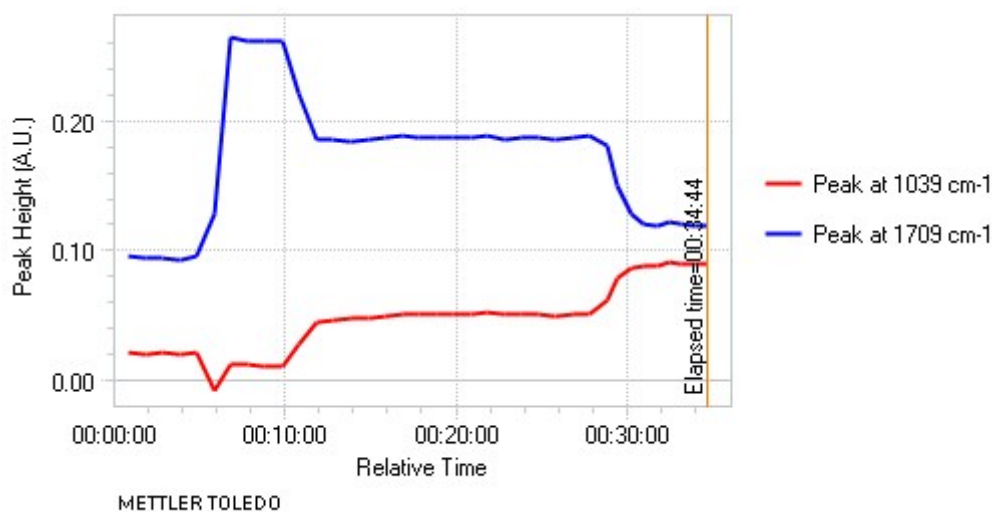

(a)

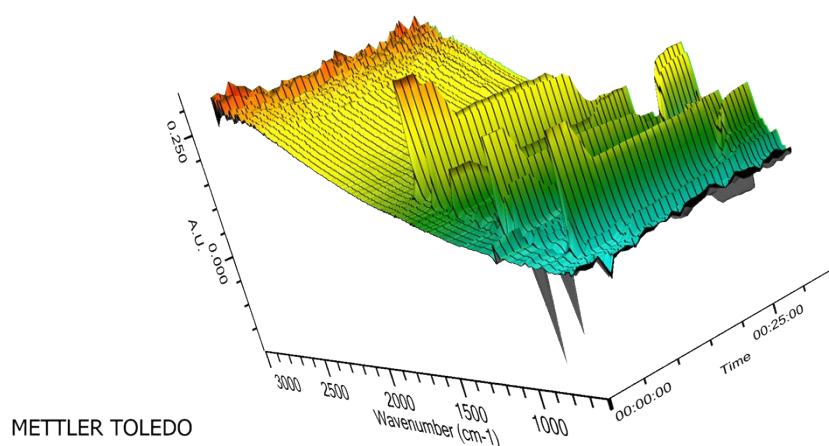

(b)

**Figure S1.** Operando IR results for the cascade reaction with three components: (a) Kinetic Profiles; (b) Three-Dimensional Fourier Transform IR (3DFT-IR) Profiles.
